# Supplementary material for: Comparing imaging, acoustics, and radar to monitor Leach’s storm-petrel colonies
Source: PeerJ. 2019 Apr 30;7:e6721. doi: 10.7717/peerj.6721 (PMC6499055; doi:10.7717/peerj.6721)
Supplement: Data S6 — To characterize the relative amount of acoustic energy from 1376-1462 Hz, we used a fast Fourier transform (window size = 372 overlap = 0.875) to measure mean relative energy in 187 separate 43-Hz frequency bins from 0-8041 Hz for each 2-second sound clip. We then calculated the mean relative energy per bin per hour and took a mean of the bins from 1376-1462 Hz. [file peerj-07-6721-s007.csv]

	SPID	channel	Date	hour	meanEnergyA	medianEnergyA	sumEnergyA	sdEnergyA
1	SMA	0	4/8/14	21	0.672369034	0.67078859	2.017107102	0.014388535
2	SMA	0	4/8/14	22	0.606531966	0.612858693	3.639191795	0.028750535
3	SMA	0	4/8/14	23	0.527281255	0.527386724	3.163687533	0.017186681
4	SMA	0	4/9/14	0	0.569266896	0.571628425	3.415601377	0.034171473
5	SMA	0	4/9/14	1	1.08938933	1.092265813	6.536335979	0.270613574
6	SMA	0	4/9/14	2	1.018004584	1.012892014	6.108027505	0.052335819
7	SMA	0	4/9/14	3	1.203193044	1.207263886	7.219158262	0.233659257
8	SMA	0	4/9/14	4	1.005187002	1.007497748	3.015561005	0.013388816
9	SMA	0	4/9/14	21	0.528163951	0.528669618	1.584491853	0.017044876
10	SMA	0	4/9/14	22	0.486490533	0.486917177	2.918943199	0.025723751
11	SMA	0	4/9/14	23	0.527628716	0.527860772	3.165772299	0.061769669
12	SMA	0	4/10/14	0	0.498810136	0.500550235	2.992860815	0.024735161
13	SMA	0	4/10/14	1	0.528859943	0.531703287	3.173159657	0.01392502
14	SMA	0	4/10/14	2	0.652407227	0.6532748	3.914443364	0.086918599
15	SMA	0	4/10/14	3	0.724800269	0.726032581	4.348801613	0.018120406
16	SMA	0	4/10/14	4	0.636043731	0.637757972	1.908131193	0.013199516
17	SMA	0	4/10/14	21	0.405032103	0.405043289	1.215096309	0.014076739
18	SMA	0	4/10/14	22	0.40275036	0.40721349	2.416502162	0.031758588
19	SMA	0	4/10/14	23	0.380010272	0.375778881	2.280061631	0.03083762
20	SMA	0	4/11/14	0	0.408111119	0.4127803	2.448666712	0.044000956
21	SMA	0	4/11/14	1	0.503982746	0.506616166	3.023896479	0.017405758
22	SMA	0	4/11/14	2	0.528656397	0.525122568	3.171938384	0.019285533
23	SMA	0	4/11/14	3	0.602384297	0.601835994	3.614305784	0.010733844
24	SMA	0	4/11/14	4	0.579395955	0.579397149	1.738187866	0.013757906
25	SMA	0	4/11/14	21	0.454661986	0.455489305	1.363985957	0.024676094
26	SMA	0	4/11/14	22	0.41502142	0.415324161	2.490128519	0.019639767
27	SMA	0	4/11/14	23	0.419103554	0.415622442	2.514621324	0.0268939
28	SMA	0	4/12/14	0	0.497035645	0.497388348	2.982213869	0.063835512
29	SMA	0	4/12/14	1	0.514078213	0.514782508	3.084469276	0.022363449
30	SMA	0	4/12/14	2	0.531354198	0.532920512	3.188125185	0.023294532
31	SMA	0	4/12/14	3	0.527153661	0.528764586	3.162921968	0.020545802
32	SMA	0	4/12/14	4	0.627500726	0.629647296	1.882502177	0.020967139
33	SMA	0	4/12/14	21	1.105714237	1.108619356	3.31714271	0.018474931
34	SMA	0	4/12/14	22	0.866716839	0.868786048	5.200301037	0.115677363
35	SMA	0	4/12/14	23	0.651443374	0.651065595	3.908660243	0.04753277
36	SMA	0	4/13/14	0	0.606586839	0.598492202	3.639521031	0.04874536
37	SMA	0	4/13/14	1	0.607837734	0.610962104	3.647026407	0.023213323
38	SMA	0	4/13/14	2	0.587774711	0.578391018	3.526648267	0.080573433
39	SMA	0	4/13/14	3	0.581912499	0.57812034	3.491474995	0.028578161
40	SMA	0	4/13/14	4	0.614682089	0.616754154	1.844046266	0.037739056
41	SMA	0	4/13/14	22	0.43708875	0.435584677	1.311266251	0.018701988
42	SMA	0	4/13/14	23	0.50821376	0.507924983	1.524641281	0.031599229
43	SMA	0	4/14/14	0	0.401775343	0.400261728	1.205326029	0.020072265
44	SMA	0	4/14/14	1	0.520193537	0.521239981	1.56058061	0.015676935
45	SMA	0	4/14/14	2	0.818681562	0.821937183	2.456044686	0.010079421
46	SMA	0	4/14/14	3	0.818901894	0.820869957	2.456705681	0.012688797
47	SMA	0	4/14/14	4	0.830984685	0.834479547	2.492954056	0.009348558
48	SMA	0	4/14/14	22	0.579526886	0.582420102	1.738580659	0.018557
49	SMA	0	4/14/14	23	0.554387424	0.543270052	3.326324543	0.082509714
50	SMA	0	4/15/14	0	0.835045935	0.72116488	5.01027561	0.244152068
51	SMA	0	4/15/14	1	0.732821101	0.731496996	4.396926609	0.027430915
52	SMA	0	4/15/14	2	0.91151335	0.916819257	5.469080098	0.211137348
53	SMA	0	4/15/14	3	1.179121365	1.179441009	7.074728189	0.221168357
54	SMA	0	4/15/14	4	1.647292565	1.65196913	9.883755389	0.175380125
55	SMA	0	4/15/14	22	0.901971415	0.907984584	2.705914244	0.014274496
56	SMA	0	4/15/14	23	0.695211712	0.686614933	4.171270271	0.044073309
57	SMA	0	4/16/14	0	0.921461799	0.85965233	5.528770795	0.12792792
58	SMA	0	4/16/14	1	1.21451008	1.215091629	7.287060478	0.294334148
59	SMA	0	4/16/14	2	1.584842032	1.583092157	9.509052194	0.09845272
60	SMA	0	4/16/14	3	1.349482617	1.348352796	8.096895704	0.116646095
61	SMA	0	4/16/14	4	1.031898409	1.023902424	6.191390456	0.022173777
62	SMA	0	4/16/14	22	0.724791498	0.729494047	2.174374495	0.012455413
63	SMA	0	4/16/14	23	0.517325944	0.52422539	3.103955663	0.019257039
64	SMA	0	4/17/14	0	0.712343925	0.721509891	4.274063552	0.110331596
65	SMA	0	4/17/14	1	1.422090077	1.417228223	8.532540463	0.092871114
66	SMA	0	4/17/14	2	1.855054783	1.857568523	11.1303287	0.164688581
67	SMA	0	4/17/14	3	1.81577076	1.815277795	10.89462456	0.157860966
68	SMA	0	4/17/14	4	2.015787471	2.013838267	12.09472482	0.068962163
69	SMA	0	4/17/14	22	0.599718414	0.603189066	1.799155243	0.02067208
70	SMA	0	4/17/14	23	0.675632758	0.645992399	4.053796548	0.121678
71	SMA	0	4/18/14	0	0.787239739	0.786053363	4.723438432	0.254743931
72	SMA	0	4/18/14	1	1.645886593	1.634360121	9.875319561	0.18158602
73	SMA	0	4/18/14	2	2.405736584	2.407768594	14.4344195	0.387800373
74	SMA	0	4/18/14	3	3.330614458	3.310132908	19.98368675	0.435391736
75	SMA	0	4/18/14	4	2.497274472	2.486692025	14.98364683	0.257955935
76	SMA	0	4/18/14	22	0.579933021	0.586842122	1.739799063	0.021593501
77	SMA	0	4/18/14	23	0.577582534	0.567710115	3.465495201	0.045444374
78	SMA	0	4/19/14	0	0.981733939	0.980446334	5.890403634	0.18521971
79	SMA	0	4/19/14	1	2.137167178	2.135540294	12.82300307	0.329175516
80	SMA	0	4/19/14	2	2.869435404	2.877684977	17.21661243	0.205332741
81	SMA	0	4/19/14	3	2.728889541	2.718900646	16.37333724	0.059273635
82	SMA	0	4/19/14	4	3.101821155	3.097101854	18.61092693	0.259590502
83	SMA	0	4/19/14	22	0.418514354	0.417448382	1.255543062	0.013615583
84	SMA	0	4/19/14	23	0.439273912	0.440943975	2.635643472	0.02944706
85	SMA	0	4/20/14	0	0.693386188	0.696752866	4.160317125	0.206311332
86	SMA	0	4/20/14	1	1.588435641	1.590053875	9.530613847	0.252005484
87	SMA	0	4/20/14	2	2.410971747	2.408994064	14.46583048	0.302764085
88	SMA	0	4/20/14	3	2.40211716	2.404662919	14.41270296	0.038474315
89	SMA	0	4/20/14	4	2.402469893	2.403071721	14.41481936	0.167656853
90	SMA	0	4/20/14	22	0.931276275	0.930226505	2.793828825	0.026305398
91	SMA	0	4/20/14	23	0.873137096	0.871078407	5.238822575	0.025353027
92	SMA	0	4/21/14	0	1.114776915	1.120395521	6.688661487	0.228193828
93	SMA	0	4/21/14	1	2.295749475	2.294892435	13.77449685	0.025393135
94	SMA	0	4/21/14	2	2.42556906	2.421115926	14.55341436	0.187926256
95	SMA	0	4/21/14	3	3.096451534	3.092415053	18.5787092	0.387034412
96	SMA	0	4/21/14	4	2.634210151	2.647054916	15.8052609	0.029211851
97	SMA	0	4/21/14	22	0.87141708	0.875912931	2.614251239	0.017556671
98	SMA	0	4/21/14	23	0.909301079	0.9044195	5.455806476	0.024662979
99	SMA	0	4/22/14	0	0.877933318	0.877683752	5.267599907	0.046878903
100	SMA	0	4/22/14	1	1.265099299	1.258637935	7.590595793	0.203716698
101	SMA	0	4/22/14	2	1.803755967	1.791707402	10.8225358	0.118844829
102	SMA	0	4/22/14	3	2.380981575	2.374540418	14.28588945	0.109489093
103	SMA	0	4/22/14	4	2.878914193	2.857661949	17.27348516	0.161270334
104	SMA	0	4/22/14	22	0.382487257	0.382890298	1.14746177	0.018018825
105	SMA	0	4/22/14	23	0.351739061	0.350161669	2.110434363	0.032449618
106	SMA	0	4/23/14	0	0.603428531	0.605552333	3.620571188	0.277157398
107	SMA	0	4/23/14	1	1.358896827	1.355915406	8.153380963	0.133819504
108	SMA	0	4/23/14	2	1.693768396	1.689106771	10.16261037	0.027666214
109	SMA	0	4/23/14	3	1.720929539	1.721631417	10.32557723	0.041619572
110	SMA	0	4/23/14	4	1.526334169	1.531339239	9.158005014	0.071495017
111	SMA	0	4/23/14	22	0.480845477	0.48337308	1.442536431	0.015969776
112	SMA	0	4/23/14	23	0.405227875	0.403963592	2.431367249	0.033728086
113	SMA	0	4/24/14	0	0.640639831	0.643562455	3.843838985	0.190318913
114	SMA	0	4/24/14	1	1.562295601	1.55348437	9.373773607	0.109774485
115	SMA	0	4/24/14	2	1.819130098	1.810377997	10.91478059	0.111316327
116	SMA	0	4/24/14	3	1.368127852	1.371367683	8.208767112	0.062218635
117	SMA	0	4/24/14	4	1.133839057	1.132635331	6.803034341	0.149573018
118	SMA	0	4/24/14	22	0.409702951	0.407285721	1.229108852	0.005506771
119	SMA	0	4/24/14	23	0.427508867	0.425179962	2.5650532	0.006001919
120	SMA	0	4/25/14	0	0.716900719	0.712761274	4.301404315	0.323773049
121	SMA	0	4/25/14	1	2.518785058	2.51856056	15.11271035	0.196083295
122	SMA	0	4/25/14	2	2.728985927	2.70129951	16.37391556	0.092964626
123	SMA	0	4/25/14	3	3.285508594	3.277732643	19.71305156	0.046023245
124	SMA	0	4/25/14	4	3.673270619	3.638771143	22.03962371	0.54840299
125	SMA	0	4/25/14	22	0.659854884	0.658577543	1.979564651	0.004313931
126	SMA	0	4/25/14	23	0.597141768	0.594597537	3.582850608	0.039571658
127	SMA	0	4/26/14	0	0.744901266	0.747611946	4.469407596	0.149048688
128	SMA	0	4/26/14	1	1.50810542	1.508712101	9.048632518	0.267814622
129	SMA	0	4/26/14	2	2.141054994	2.138291911	12.84632997	0.184586673
130	SMA	0	4/26/14	3	2.886680345	2.870652877	17.32008207	0.394635441
131	SMA	0	4/26/14	4	3.116205418	3.162990846	9.348616253	0.082192551
132	SMA	0	4/26/14	22	0.370637657	0.370905253	1.111912972	0.00570606
133	SMA	0	4/26/14	23	0.404925098	0.405800775	2.429550588	0.040950504
134	SMA	0	4/27/14	0	0.580552067	0.578005446	3.483312399	0.018918589
135	SMA	0	4/27/14	1	1.11283012	1.107461512	6.676980718	0.042231902
136	SMA	0	4/27/14	2	1.209190518	1.200383329	7.255143108	0.383610253
137	SMA	0	4/27/14	3	1.206881227	1.196023474	7.241287362	0.291816782
138	SMA	0	4/27/14	4	0.856306835	0.854837506	2.568920504	0.004222059
139	SMA	0	4/27/14	22	0.506467539	0.505916993	1.519402617	0.012081989
140	SMA	0	4/27/14	23	0.491658176	0.49341154	2.949949056	0.020546592
141	SMA	0	4/28/14	0	0.635786684	0.639929702	3.814720107	0.104535333
142	SMA	0	4/28/14	1	1.827905999	1.816225949	10.96743599	0.493347727
143	SMA	0	4/28/14	2	2.596293257	2.59839936	15.57775954	0.085125186
144	SMA	0	4/28/14	3	3.217695246	3.178835424	19.30617147	0.454737886
145	SMA	0	4/28/14	4	2.587720078	2.60448314	7.763160234	0.058715828
146	SMA	0	4/28/14	22	0.512036169	0.510814582	1.536108507	0.014386274
147	SMA	0	4/28/14	23	0.520516186	0.520365789	3.123097113	0.036993085
148	SMA	0	4/29/14	0	0.687159733	0.69226334	4.122958395	0.16181992
149	SMA	0	4/29/14	1	2.437812926	2.4002139	14.62687755	0.602970701
150	SMA	0	4/29/14	2	3.420078612	3.398067835	20.52047167	0.139474939
151	SMA	0	4/29/14	3	3.491001308	3.463422064	20.94600785	0.214943437
152	SMA	0	4/29/14	4	3.40310032	3.442046543	10.20930096	0.081281603
153	SMA	0	4/29/14	22	0.495023746	0.493138345	1.485071238	0.012998138
154	SMA	0	4/29/14	23	0.439625099	0.441429386	2.637750594	0.017492565
155	SMA	0	4/30/14	0	0.875352864	0.876204856	5.252117187	0.267479821
156	SMA	0	4/30/14	1	1.450588964	1.447758118	8.703533786	0.369098431
157	SMA	0	4/30/14	2	1.968619065	1.944206101	11.81171439	0.473998754
158	SMA	0	4/30/14	3	2.43654076	2.421303654	14.61924456	0.08311932
159	SMA	0	4/30/14	4	2.5222797	2.542171106	7.566839101	0.043136554
160	SMA	0	4/30/14	22	0.269274017	0.269441191	0.807822052	0.008348027
161	SMA	0	4/30/14	23	0.307569068	0.305902015	1.845414411	0.012839269
162	SMA	0	5/1/14	0	0.803081368	0.796482935	4.818488208	0.429495607
163	SMA	0	5/1/14	1	1.86196853	1.857337771	11.17181118	0.225741957
164	SMA	0	5/1/14	2	2.54342096	2.526196679	15.26052576	0.241424697
165	SMA	0	5/1/14	3	2.522887572	2.526661802	15.13732543	0.029586707
166	SMA	0	5/1/14	4	2.620768247	2.627081819	7.86230474	0.021046596
167	SMA	0	5/1/14	22	0.277936667	0.276979545	0.833810002	0.009250692
168	SMA	0	5/1/14	23	0.286570512	0.286345498	1.719423074	0.030882625
169	SMA	0	5/2/14	0	0.573304814	0.571440311	3.439828881	0.217021013
170	SMA	0	5/2/14	1	1.402909412	1.401325703	8.417456474	0.028517074
171	SMA	0	5/2/14	2	1.614534726	1.615828523	9.687208355	0.018886214
172	SMA	0	5/2/14	3	1.680701251	1.689944962	10.08420751	0.016684502
173	SMA	0	5/2/14	4	1.462966051	1.46971649	4.388898153	0.022975256
174	SMA	0	5/2/14	22	0.337615612	0.336979055	1.012846837	0.01047676
175	SMA	0	5/2/14	23	0.353225016	0.352349167	2.119350095	0.012215472
176	SMA	0	5/3/14	0	0.567759018	0.56755109	3.406554108	0.230131852
177	SMA	0	5/3/14	1	1.863531837	1.859449555	11.18119102	0.21754193
178	SMA	0	5/3/14	2	2.459969458	2.437937026	14.75981675	0.197651392
179	SMA	0	5/3/14	3	3.170507808	3.143656913	19.02304685	0.246333673
180	SMA	0	5/3/14	4	2.469182137	2.485995589	7.407546412	0.031309671
181	SMA	0	5/3/14	22	0.422498392	0.420612731	1.267495177	0.011877067
182	SMA	0	5/3/14	23	0.471916895	0.468860982	2.831501369	0.018307438
183	SMA	0	5/4/14	0	0.668319009	0.672785982	4.009914055	0.224766765
184	SMA	0	5/4/14	1	1.24753501	1.24620466	7.485210062	0.183556674
185	SMA	0	5/4/14	2	1.593417847	1.604584786	9.560507084	0.037875318
186	SMA	0	5/4/14	3	1.412824815	1.412020294	8.476948891	0.052847672
187	SMA	0	5/4/14	22	0.407131267	0.402546717	1.221393801	0.016925004
188	SMA	0	5/4/14	23	0.415463928	0.418675801	2.492783571	0.019592202
189	SMA	0	5/5/14	0	0.821781841	0.813384028	4.930691044	0.440837705
190	SMA	0	5/5/14	1	2.242010397	2.2268563	13.45206238	0.087863707
191	SMA	0	5/5/14	2	2.239172936	2.224920568	13.43503762	0.131322957
192	SMA	0	5/5/14	3	2.264797332	2.274684752	13.58878399	0.037928072
193	SMA	0	5/5/14	22	0.587482088	0.584309777	1.762446263	0.007420778
194	SMA	0	5/5/14	23	0.452575364	0.453075774	2.715452183	0.032206374
195	SMA	0	5/6/14	0	0.60301882	0.608513114	3.618112922	0.200298436
196	SMA	0	5/6/14	1	1.704678171	1.701829601	10.22806902	0.219524947
197	SMA	0	5/6/14	2	1.888046455	1.89108742	11.32827873	0.096016521
198	SMA	0	5/6/14	3	2.220297843	2.20985419	13.32178706	0.10687472
199	SMA	0	5/6/14	22	0.949988325	0.950172208	2.849964976	0.001097191
200	SMA	0	5/6/14	23	0.734480935	0.739648293	4.406885611	0.071120444
201	SMA	0	5/7/14	0	0.569406011	0.567545208	3.416436063	0.04423086
202	SMA	0	5/7/14	1	0.769829713	0.768230169	4.618978278	0.10470766
203	SMA	0	5/7/14	2	1.071793653	1.073342724	6.430761921	0.046640349
204	SMA	0	5/7/14	3	1.215616015	1.214028312	3.646848044	0.014547564
205	SMA	0	5/7/14	22	0.311829715	0.312300966	0.935489146	0.022266844
206	SMA	0	5/7/14	23	0.297336695	0.29609696	1.78402017	0.028685374
207	SMA	0	5/8/14	0	0.363458249	0.364216886	2.180749494	0.114324138
208	SMA	0	5/8/14	1	1.242526454	1.236597969	7.455158723	0.380670606
209	SMA	0	5/8/14	2	1.857898664	1.850982343	11.14739198	0.174337768
210	SMA	0	5/8/14	3	2.177321875	2.184269417	13.06393125	0.312215263
211	SMA	0	5/8/14	22	0.400198535	0.398910886	1.200595604	0.018125704
212	SMA	0	5/8/14	23	0.428559879	0.427795429	2.571359271	0.034160032
213	SMA	0	5/9/14	0	0.581824437	0.58246581	3.49094662	0.10639304
214	SMA	0	5/9/14	1	1.047274918	1.052583266	6.283649507	0.23597476
215	SMA	0	5/9/14	2	1.27164912	1.260876875	7.629894722	0.087600242
216	SMA	0	5/9/14	3	1.419944771	1.411254427	8.519668628	0.325666588
217	SMA	0	5/10/14	22	1.246212908	1.244741181	3.738638723	0.021568569
218	SMA	0	5/10/14	23	0.720951067	0.7237072	4.325706404	0.11224043
219	SMA	0	5/11/14	0	0.457299568	0.455422386	2.743797408	0.020659653
220	SMA	0	5/11/14	1	0.720375406	0.723398291	4.322252435	0.123901288
221	SMA	0	5/11/14	2	0.959979919	0.964075376	5.759879516	0.045721061
222	SMA	0	5/11/14	3	1.217450204	1.215837282	7.304701223	0.054603663
223	SMA	0	5/12/14	22	0.222853665	0.221873926	0.668560995	0.018327989
224	SMA	0	5/12/14	23	0.241823085	0.243384688	1.45093851	0.022270777
225	SMA	0	5/13/14	0	0.370184835	0.372067649	2.221109009	0.136760112
226	SMA	0	5/13/14	1	0.80372515	0.801756771	4.822350898	0.097920669
227	SMA	0	5/13/14	2	1.303100328	1.305721884	7.818601967	0.259683814
228	SMA	0	5/13/14	3	1.546715965	1.546495505	9.28029579	0.008798316
229	SMA	0	5/13/14	22	0.316806367	0.316379383	0.9504191	0.019219858
230	SMA	0	5/13/14	23	0.447577976	0.44638338	2.685467859	0.119182566
231	SMA	0	5/14/14	0	0.755400092	0.74082547	4.532400549	0.029541723
232	SMA	0	5/14/14	1	1.679479877	1.673206147	10.07687926	0.252438475
233	SMA	0	5/14/14	2	2.191053997	2.193324831	13.14632398	0.103312415
234	SMA	0	5/14/14	3	2.990461554	2.971751281	17.94276932	0.396680067
235	SMA	0	5/14/14	22	0.257004812	0.256033254	0.771014436	0.015087127
236	SMA	0	5/14/14	23	0.292294844	0.288460632	1.753769062	0.020745084
237	SMA	0	5/15/14	0	0.374215731	0.37338355	2.245294384	0.028201067
238	SMA	0	5/15/14	1	1.698887606	1.717871336	10.19332564	0.063116479
239	SMA	0	5/15/14	2	2.350890865	2.341795271	14.10534519	0.179952241
240	SMA	0	5/15/14	3	2.531786785	2.519262803	15.19072071	0.075877877
241	SMA	0	5/15/14	22	0.26341813	0.262568592	0.790254389	0.015778033
242	SMA	0	5/15/14	23	0.309503338	0.310387794	1.857020029	0.019668678
243	SMA	0	5/16/14	0	0.553778738	0.545378443	3.322672431	0.221553256
244	SMA	0	5/16/14	1	2.113103765	2.099970327	12.67862259	0.391916889
245	SMA	0	5/16/14	2	2.112429478	2.109368423	12.67457687	0.130021357
246	SMA	0	5/16/14	3	2.444199358	2.442841358	7.332598074	0.004879856
247	SMA	0	5/16/14	22	0.66123234	0.660950029	1.983697019	0.003432098
248	SMA	0	5/16/14	23	0.440277864	0.441599951	2.641667185	0.113761678
249	SMA	0	5/17/14	0	0.4559411	0.458086325	2.735646599	0.1550537
250	SMA	0	5/17/14	1	2.110998557	2.107709524	12.66599134	0.669869801
251	SMA	0	5/17/14	2	3.384799411	3.379328752	20.30879646	0.215262067
252	SMA	0	5/17/14	3	2.970111595	2.970096149	8.910334784	0.019641924
253	SMA	0	5/17/14	22	0.240056642	0.239834172	0.720169927	0.013118162
254	SMA	0	5/17/14	23	0.258454824	0.258413502	1.550728943	0.025140961
255	SMA	0	5/18/14	0	0.753676898	0.741506932	4.522061389	0.290231233
256	SMA	0	5/18/14	1	1.756709784	1.749750662	10.54025871	0.201625969
257	SMA	0	5/18/14	2	2.718228519	2.715288139	16.30937111	0.279385309
258	SMA	0	5/18/14	3	2.273410601	2.281840635	6.820231804	0.022427284
259	SMA	0	5/19/14	22	0.91959404	0.915308424	2.758782121	0.008553306
260	SMA	0	5/19/14	23	0.403939688	0.405386631	2.423638128	0.050700675
261	SMA	0	5/20/14	0	0.707068161	0.698543446	4.242408964	0.17294441
262	SMA	0	5/20/14	1	1.784222957	1.774521127	10.70533774	0.345078044
263	SMA	0	5/20/14	2	2.868328662	2.868937066	17.20997197	0.27856873
264	SMA	0	5/20/14	3	2.899181019	2.913906248	8.697543058	0.026447607
265	SMA	0	5/20/14	22	1.065161055	1.061779349	3.195483164	0.032723269
266	SMA	0	5/20/14	23	0.963662802	0.963470271	5.781976811	0.014973097
267	SMA	0	5/21/14	0	1.445311983	1.44001718	8.671871897	0.333811489
268	SMA	0	5/21/14	1	0.963519485	0.960784674	5.781116908	0.082775487
269	SMA	0	5/21/14	2	1.219590049	1.218835023	7.317540294	0.074750951
270	SMA	0	5/21/14	3	1.283542594	1.288753751	3.850627783	0.022629524
271	SMA	0	5/21/14	22	1.316378806	1.317800301	3.949136417	0.024888114
272	SMA	0	5/21/14	23	0.911995748	0.908256328	5.471974488	0.112922916
273	SMA	0	5/22/14	0	0.482452088	0.480264543	2.894712527	0.121206437
274	SMA	0	5/22/14	1	0.538295925	0.539748511	3.229775553	0.098090852
275	SMA	0	5/22/14	2	1.048847014	1.047021263	6.293082086	0.157309447
276	SMA	0	5/22/14	3	1.276521827	1.276810406	3.829565481	0.006401854
277	SMA	0	5/22/14	22	0.272736105	0.271998173	0.818208316	0.014235154
278	SMA	0	5/22/14	23	0.301661607	0.302452913	1.809969641	0.013928911
279	SMA	0	5/23/14	0	0.453393049	0.458921401	2.720358293	0.156785023
280	SMA	0	5/23/14	1	1.877733923	1.867594359	11.26640354	0.402034265
281	SMA	0	5/23/14	2	2.621301595	2.61636384	15.72780957	0.154438727
282	SMA	0	5/23/14	3	2.707165095	2.709562622	8.121495286	0.020193027
283	SMA	0	5/24/14	22	0.447552292	0.44535172	1.342656875	0.018793473
284	SMA	0	5/24/14	23	0.334080986	0.334839836	2.004485916	0.018374071
285	SMA	0	5/25/14	0	0.404463832	0.403728207	2.426782989	0.041324209
286	SMA	0	5/25/14	1	1.485963872	1.463592074	8.915783235	0.499702365
287	SMA	0	5/25/14	2	2.008608178	1.992534066	12.05164907	0.082594417
288	SMA	0	5/25/14	3	2.319556257	2.328118373	6.958668771	0.019910089
289	SMA	0	5/25/14	22	0.206290388	0.205463272	0.618871164	0.013327624
290	SMA	0	5/25/14	23	0.245935532	0.243840171	1.47561319	0.022187579
291	SMA	0	5/26/14	0	0.322910421	0.323341743	1.937462526	0.07009129
292	SMA	0	5/26/14	1	1.510719495	1.510503726	9.064316967	0.472158244
293	SMA	0	5/26/14	2	2.510331764	2.498712977	15.06199058	0.125798501
294	SMA	0	5/26/14	3	2.842260286	2.850219423	8.526780859	0.016350734
295	SMA	0	5/27/14	22	0.360029887	0.362899302	1.080089661	0.019913717
296	SMA	0	5/27/14	23	0.29000555	0.288545134	1.7400333	0.030583394
297	SMA	0	5/28/14	0	0.398288824	0.400877293	2.389732942	0.060304025
298	SMA	0	5/28/14	1	2.039726305	1.998316214	12.23835783	0.980376339
299	SMA	0	5/28/14	2	2.826200471	2.798906054	16.95720283	0.250433185
300	SMA	0	5/28/14	3	2.731858061	2.728548682	8.195574183	0.020897773
301	SMA	0	5/29/14	23	0.529082948	0.528417974	1.587248843	0.017240618
302	SMA	0	5/30/14	0	0.480827289	0.478421881	1.442481868	0.020693382
303	SMA	0	5/30/14	1	0.789842199	0.788466826	2.369526596	0.023504844
304	SMA	0	5/30/14	2	1.523426912	1.528622603	4.570280737	0.01128211
305	SMA	0	5/30/14	3	2.011726602	2.010242194	6.035179806	0.011187373
306	SMA	0	5/30/14	23	0.245458113	0.245125632	0.736374339	0.014760991
307	SMA	0	5/31/14	0	0.282374512	0.281517662	1.694247073	0.017163123
308	SMA	0	5/31/14	1	0.747279307	0.745767128	4.483675839	0.211202218
309	SMA	0	5/31/14	2	1.719196595	1.734100639	10.31517957	0.325733201
310	SMA	0	5/31/14	3	2.90749171	2.880654839	17.44495026	0.216144594
311	SMA	0	5/31/14	23	0.722368651	0.723069674	2.167105952	0.018411206
312	SMA	0	6/1/14	0	0.587546787	0.59018074	3.525280719	0.077015436
313	SMA	0	6/1/14	1	0.883684098	0.888350621	5.302104589	0.276473406
314	SMA	0	6/1/14	2	1.513144606	1.50735503	9.078867638	0.246379146
315	SMA	0	6/1/14	3	2.260642644	2.260266467	13.56385586	0.062168894
316	SMA	0	6/3/14	23	0.369350737	0.37055569	1.108052211	0.021685151
317	SMA	0	6/4/14	0	0.370072297	0.372567247	2.220433779	0.036232494
318	SMA	0	6/4/14	1	0.690622402	0.687183125	4.143734411	0.12183846
319	SMA	0	6/4/14	2	1.622033802	1.634261693	9.732202811	0.192791044
320	SMA	0	6/4/14	3	2.008027782	2.013738605	12.04816669	0.084372412
321	SMA	0	6/4/14	23	0.390894743	0.395521108	1.17268423	0.024250165
322	SMA	0	6/5/14	0	0.35487917	0.354445041	2.129275019	0.031171242
323	SMA	0	6/5/14	1	0.570733632	0.581426706	3.424401791	0.141243198
324	SMA	0	6/5/14	2	0.819725767	0.816086364	4.918354604	0.210376786
325	SMA	0	6/5/14	3	1.155713027	1.148734123	6.93427816	0.064893376
326	SMA	0	6/8/14	23	0.980395158	0.985062818	2.941185475	0.026480924
327	SMA	0	6/9/14	0	0.748051451	0.739606399	4.488308704	0.035546205
328	SMA	0	6/9/14	1	0.789078795	0.791991526	4.734472771	0.02138183
329	SMA	0	6/9/14	2	0.836100654	0.834198273	5.016603921	0.051288113
330	SMA	0	6/9/14	3	0.822856226	0.826436871	4.937137359	0.019722509
331	SMA	0	6/11/14	23	0.291809365	0.294391436	0.875428095	0.019006416
332	SMA	0	6/12/14	0	0.248766004	0.248755475	1.492596021	0.018721184
333	SMA	0	6/12/14	1	0.511067915	0.511103249	3.066407488	0.192525162
334	SMA	0	6/12/14	2	1.190536126	1.182855207	7.143216757	0.072599823
335	SMA	0	6/12/14	3	1.524774782	1.503736929	9.148648694	0.083717827
336	SMA	0	6/19/14	23	0.31689052	0.316518128	0.95067156	0.020194977
337	SMA	0	6/20/14	0	0.400408633	0.403598456	2.4024518	0.051856029
338	SMA	0	6/20/14	1	0.901241566	0.900627529	5.407449395	0.275222576
339	SMA	0	6/20/14	2	1.730770195	1.730094983	10.38462117	0.067257255
340	SMA	0	6/20/14	3	2.213279899	2.221728893	13.27967939	0.03600362
341	SMA	0	6/20/14	23	0.426933405	0.427739838	1.280800214	0.022493358
342	SMA	0	6/21/14	0	0.428868822	0.431157569	2.573212934	0.027637853
343	SMA	0	6/21/14	1	0.832827735	0.83185555	4.996966407	0.22674758
344	SMA	0	6/21/14	2	1.308489597	1.305957106	7.850937581	0.077045278
345	SMA	0	6/21/14	3	1.826475471	1.819524486	10.95885283	0.039674057
346	SMA	0	6/21/14	23	0.354257396	0.35719546	1.062772189	0.035315224
347	SMA	0	6/22/14	0	0.383614123	0.386383128	2.301684736	0.032491989
348	SMA	0	6/22/14	1	0.669822344	0.668108514	4.018934066	0.304101003
349	SMA	0	6/22/14	2	1.903206842	1.897243746	11.41924105	0.432751088
350	SMA	0	6/22/14	3	2.29536483	2.279090671	13.77218898	0.495505699
351	SMA	0	6/23/14	23	0.347842681	0.349612316	1.043528043	0.023693652
352	SMA	0	6/24/14	0	0.409558748	0.412196833	2.457352487	0.024634352
353	SMA	0	6/24/14	1	0.73509392	0.732829467	4.410563519	0.300543269
354	SMA	0	6/24/14	2	2.193649369	2.188597773	13.16189621	0.630320872
355	SMA	0	6/24/14	3	2.965693911	2.959604377	17.79416346	0.063658275
356	SMA	0	6/24/14	23	0.411866493	0.414634073	1.235599479	0.043997598
357	SMA	0	6/25/14	0	0.405175936	0.407733815	2.431055615	0.031238603
358	SMA	0	6/25/14	1	0.794837292	0.794430793	4.769023751	0.297232754
359	SMA	0	6/25/14	2	1.102233692	1.100453714	6.613402149	0.152046296
360	SMA	0	6/25/14	3	1.711932886	1.717327039	10.27159731	0.330728474
361	SMA	0	6/25/14	23	0.31401934	0.316052828	0.94205802	0.027047128
362	SMA	0	6/26/14	0	0.333825836	0.333267168	2.002955014	0.024077218
363	SMA	0	6/26/14	1	0.606548011	0.611160598	3.639288066	0.044919579
364	SMA	0	6/26/14	2	0.844798565	0.841798815	5.068791392	0.023767309
365	SMA	0	6/26/14	3	1.278595956	1.279870786	7.671575735	0.15867037
366	SMA	0	6/30/14	23	0.388516335	0.388766501	1.165549006	0.041626842
367	SMA	0	7/1/14	0	0.37353665	0.370776859	2.241219899	0.035786814
368	SMA	0	7/1/14	1	0.54022913	0.5386185	3.241374777	0.16687323
369	SMA	0	7/1/14	2	1.143356173	1.149585728	6.860137038	0.238821737
370	SMA	0	7/1/14	3	1.877593039	1.868155888	11.26555824	0.091106642
371	SMA	0	7/3/14	23	0.339879895	0.338384549	1.019639685	0.023448894
372	SMA	0	7/4/14	0	0.348948578	0.345504195	2.093691467	0.03025417
373	SMA	0	7/4/14	1	0.420450323	0.420074641	2.522701941	0.151339074
374	SMA	0	7/4/14	2	1.181996376	1.181308453	7.091978259	0.011244672
375	SMA	0	7/4/14	3	1.351809375	1.340066282	8.11085625	0.082789345
376	SMA	0	7/4/14	23	0.307566364	0.307433706	0.922699091	0.026445359
377	SMA	0	7/5/14	0	0.334499668	0.334475292	2.006998008	0.036567422
378	SMA	0	7/5/14	1	0.45337641	0.455974205	2.720258463	0.191447353
379	SMA	0	7/5/14	2	1.51124171	1.503763612	9.06745026	0.531675047
380	SMA	0	7/5/14	3	1.768769801	1.75961997	10.61261881	0.037488559
381	SMA	0	7/5/14	23	0.275749937	0.278107269	0.827249812	0.028716194
382	SMA	0	7/6/14	0	0.285191278	0.285185708	1.711147666	0.018447889
383	SMA	0	7/6/14	1	0.42625382	0.428899772	2.55752292	0.13741261
384	SMA	0	7/6/14	2	0.996939139	0.997595835	5.981634833	0.169646211
385	SMA	0	7/6/14	3	1.313348365	1.315984408	7.880090188	0.066945298
386	SMA	0	7/6/14	23	0.354002337	0.35305667	1.062007011	0.043170046
387	SMA	0	7/7/14	0	0.385781935	0.380935826	2.314691612	0.050884281
388	SMA	0	7/7/14	1	0.467166612	0.46814047	2.802999672	0.127338364
389	SMA	0	7/7/14	2	0.883057714	0.885266188	5.298346285	0.10479998
390	SMA	0	7/7/14	3	1.252169215	1.247182913	7.513015289	0.020314666
391	SMA	0	7/7/14	23	0.343595025	0.343781086	1.030785076	0.037173175
392	SMA	0	7/8/14	0	0.331887514	0.333261446	1.991325086	0.030789489
393	SMA	0	7/8/14	1	0.363199256	0.365472823	2.179195539	0.084902259
394	SMA	0	7/8/14	2	0.712418837	0.70706137	4.274513023	0.075950906
395	SMA	0	7/8/14	3	0.912374273	0.911084805	5.474245636	0.028381936
396	SMA	0	7/8/14	23	0.314643404	0.314336796	0.943930211	0.027750813
397	SMA	0	7/9/14	0	0.377947875	0.377516371	2.267687248	0.040853793
398	SMA	0	7/9/14	1	0.397341131	0.40541442	2.384046786	0.053460154
399	SMA	0	7/9/14	2	0.672151078	0.675556641	4.032906467	0.157201276
400	SMA	0	7/9/14	3	1.110337351	1.099658775	6.662024106	0.086789316
401	SMA	0	7/9/14	23	0.375170683	0.375891706	1.12551205	0.033658507
402	SMA	0	7/10/14	0	0.430753746	0.428284652	2.584522473	0.047027879
403	SMA	0	7/10/14	1	0.435679245	0.435519206	2.614075473	0.059989938
404	SMA	0	7/10/14	2	0.576163129	0.572270526	3.456978774	0.077262151
405	SMA	0	7/10/14	3	0.710778317	0.705221563	4.264669901	0.03774913
406	SMA	0	7/11/14	23	0.351833561	0.355116631	1.055500682	0.048614104
407	SMA	0	7/12/14	0	0.603341638	0.601357723	3.620049827	0.105557783
408	SMA	0	7/12/14	1	0.543855976	0.542211876	3.263135853	0.280746294
409	SMA	0	7/12/14	2	0.957775132	0.958628777	5.746650793	0.111064468
410	SMA	0	7/12/14	3	0.885636436	0.88579892	5.313818618	0.023320182
411	SMA	0	7/13/14	23	0.341217565	0.340415684	1.023652696	0.028672014
412	SMA	0	7/14/14	0	0.273905489	0.273472527	1.643432935	0.025001039
413	SMA	0	7/14/14	1	0.3859677	0.39214726	2.315806202	0.119840802
414	SMA	0	7/14/14	2	0.704074991	0.708992997	4.224449943	0.060766524
415	SMA	0	7/14/14	3	0.931095292	0.920195292	5.586571755	0.049801962
416	SMA	0	7/14/14	23	0.379350031	0.381839205	1.138050094	0.032233058
417	SMA	0	7/15/14	0	0.378679574	0.379302417	2.272077444	0.037931103
418	SMA	0	7/15/14	1	0.457738959	0.459711803	2.746433755	0.112866815
419	SMA	0	7/15/14	2	0.844615207	0.84118727	5.06769124	0.051988076
420	SMA	0	7/15/14	3	0.794048661	0.798208191	4.764291967	0.02239437
421	SMA	0	7/19/14	23	0.303278375	0.300701045	0.909835126	0.039555882
422	SMA	0	7/20/14	0	0.312276632	0.311344946	1.873659792	0.042511348
423	SMA	0	7/20/14	1	0.595238526	0.620473807	3.571431157	0.194692662
424	SMA	0	7/20/14	2	1.126736977	1.119207844	6.760421859	0.046729152
425	SMA	0	7/20/14	3	1.217552282	1.220752876	7.305313692	0.069925136
426	SMA	0	7/20/14	23	0.370823547	0.372350538	1.112470641	0.045990474
427	SMA	0	7/21/14	0	0.485473555	0.48504855	2.912841328	0.073652426
428	SMA	0	7/21/14	1	0.372497145	0.372330552	2.23498287	0.096937301
429	SMA	0	7/21/14	2	0.68471901	0.678382777	4.108314063	0.031880676
430	SMA	0	7/21/14	3	0.92352083	0.920605039	5.541124983	0.016597434
431	SMA	0	7/21/14	23	0.310209653	0.306090861	0.930628959	0.055348062
432	SMA	0	7/22/14	0	0.327068248	0.31467638	1.962409489	0.059545139
433	SMA	0	7/22/14	1	0.516236249	0.522478889	3.097417496	0.145544211
434	SMA	0	7/22/14	2	0.973195113	0.965067999	5.839170677	0.156657326
435	SMA	0	7/22/14	3	1.266501447	1.257536782	7.599008684	0.090385392
436	SMA	0	7/22/14	22	0.204285882	0.203775447	0.612857647	0.01585898
437	SMA	0	7/22/14	23	0.364852426	0.363563264	2.189114554	0.053836253
438	SMA	0	7/23/14	0	0.323322178	0.316866458	1.939933065	0.035274057
439	SMA	0	7/23/14	1	0.4838692	0.480001983	2.903215198	0.035831264
440	SMA	0	7/23/14	2	0.585939974	0.58763834	3.515639843	0.026408744
441	SMA	0	7/23/14	3	0.797676772	0.799701995	2.393030315	0.014301501
442	SMA	0	7/23/14	22	0.296349117	0.294241515	0.889047352	0.024326595
443	SMA	0	7/23/14	23	0.371660599	0.372816185	2.229963595	0.031905715
444	SMA	0	7/24/14	0	0.359629783	0.363481294	2.157778696	0.04194292
445	SMA	0	7/24/14	1	0.512796056	0.502860207	3.076776336	0.094662785
446	SMA	0	7/24/14	2	1.076168173	1.080894087	6.457009037	0.33537899
447	SMA	0	7/24/14	3	1.11880159	1.120573242	3.356404771	0.030023583
448	SMA	0	7/24/14	22	0.625020458	0.625095876	1.875061375	0.026924503
449	SMA	0	7/24/14	23	0.662400949	0.647885538	3.974405697	0.074728103
450	SMA	0	7/25/14	0	0.589125593	0.588211799	3.534753559	0.039082123
451	SMA	0	7/25/14	1	0.58592074	0.582781768	3.515524441	0.038129226
452	SMA	0	7/25/14	2	0.523093793	0.521907825	3.138562759	0.029154849
453	SMA	0	7/25/14	3	0.516942562	0.521956396	1.550827685	0.022972848
454	SMA	0	7/25/14	22	0.440599599	0.452062318	1.321798797	0.022400725
455	SMA	0	7/25/14	23	0.346794311	0.344847987	2.080765868	0.035537277
456	SMA	0	7/26/14	0	0.288252224	0.278406579	1.729513346	0.058091965
457	SMA	0	7/26/14	1	0.37346986	0.368716828	2.240819162	0.080651168
458	SMA	0	7/26/14	2	0.549908303	0.546731365	3.299449816	0.037147617
459	SMA	0	7/26/14	3	0.761454049	0.762718141	2.284362148	0.022421642
460	SMA	0	7/26/14	22	0.319220979	0.318441765	0.957662936	0.031644573
461	SMA	0	7/26/14	23	0.391086059	0.389304604	2.346516352	0.061126872
462	SMA	0	7/27/14	0	0.247606987	0.239177209	1.48564192	0.049521379
463	SMA	0	7/27/14	1	0.394043244	0.394025961	2.364259467	0.069934418
464	SMA	0	7/27/14	2	0.65455556	0.656150736	3.927333362	0.013613394
465	SMA	0	7/27/14	3	0.691055956	0.693374791	2.073167867	0.018257372
466	SMA	0	7/27/14	22	0.40060186	0.395676174	1.201805579	0.066924207
467	SMA	0	7/27/14	23	0.421979758	0.410651251	2.531878545	0.088912566
468	SMA	0	7/28/14	0	0.309804125	0.298173106	1.858824752	0.045146431
469	SMA	0	7/28/14	1	0.498545654	0.499836255	2.991273927	0.092038243
470	SMA	0	7/28/14	2	0.815193584	0.810748233	4.891161506	0.044688365
471	SMA	0	7/28/14	3	0.920193313	0.923508532	5.521159876	0.037260647
472	SMA	0	7/28/14	22	0.460275626	0.458730872	1.380826877	0.076925408
473	SMA	0	7/28/14	23	0.326334625	0.328207466	1.958007753	0.046987009
474	SMA	0	7/29/14	0	0.304611091	0.298748936	1.827666547	0.032069578
475	SMA	0	7/29/14	1	0.624060126	0.6132	3.744360755	0.080085757
476	SMA	0	7/29/14	2	0.827169322	0.827046472	4.963015929	0.027825163
477	SMA	0	7/29/14	3	0.969799261	0.965726754	5.818795564	0.030688869
478	SMA	0	7/29/14	22	0.335679871	0.338209549	1.007039612	0.037793074
479	SMA	0	7/29/14	23	0.405684123	0.409038461	2.434104739	0.063431259
480	SMA	0	7/30/14	0	0.310046829	0.310716276	1.860280976	0.032748005
481	SMA	0	7/30/14	1	0.641688893	0.644628713	3.850133356	0.11436535
482	SMA	0	7/30/14	2	0.900514529	0.902206047	5.403087174	0.063509216
483	SMA	0	7/30/14	3	1.104948047	1.105660372	6.62968828	0.083276006
484	SMA	0	7/30/14	22	0.280337418	0.281266416	0.841012253	0.032014282
485	SMA	0	7/30/14	23	0.308498255	0.309852832	1.850989528	0.038490823
486	SMA	0	7/31/14	0	0.287155501	0.276306253	1.722933009	0.059963173
487	SMA	0	7/31/14	1	0.5325326	0.530017957	3.195195602	0.15733256
488	SMA	0	7/31/14	2	0.806926432	0.810801293	4.84155859	0.038497394
489	SMA	0	7/31/14	3	0.851640781	0.855882135	5.109844684	0.041390083
490	SMA	0	8/1/14	22	0.304175273	0.303972724	0.912525818	0.029769268
491	SMA	0	8/1/14	23	0.317972453	0.313889424	1.907834715	0.036411209
492	SMA	0	8/2/14	0	0.262939441	0.254707659	1.577636647	0.038139958
493	SMA	0	8/2/14	1	0.597328672	0.594001847	3.58397203	0.090142326
494	SMA	0	8/2/14	2	0.898888314	0.89383912	5.393329886	0.147033355
495	SMA	0	8/2/14	3	1.217849176	1.212163401	7.307095059	0.061725654
496	SMA	0	8/2/14	4	1.420615162	1.430445345	4.261845487	0.029959099
497	SMA	0	8/3/14	22	0.311427105	0.311460299	0.934281314	0.038734999
498	SMA	0	8/3/14	23	0.357464208	0.346157387	2.144785247	0.066312276
499	SMA	0	8/4/14	0	0.270304979	0.265218793	1.621829873	0.029256875
500	SMA	0	8/4/14	1	0.457741767	0.450858134	2.746450603	0.113381988
501	SMA	0	8/4/14	2	0.935361416	0.933212647	5.612168495	0.111623543
502	SMA	0	8/4/14	3	1.060242082	1.056837995	6.361452492	0.035394145
503	SMA	0	8/4/14	4	0.987119083	0.989313944	2.961357249	0.005991396
504	SMA	0	8/13/14	22	0.395128772	0.395351463	1.185386316	0.031421584
505	SMA	0	8/13/14	23	0.427985092	0.425831681	2.56791055	0.036050602
506	SMA	0	8/14/14	0	0.370034109	0.372082367	2.220204651	0.023449628
507	SMA	0	8/14/14	1	0.604901073	0.603690096	3.629406436	0.09219913
508	SMA	0	8/14/14	2	0.683788579	0.680169688	4.102731475	0.028285159
509	SMA	0	8/14/14	3	0.535761299	0.535453892	3.214567795	0.063012275
510	SMA	0	8/14/14	4	0.451188758	0.451430772	1.353566275	0.017090801
511	SMA	0	8/15/14	22	0.381012401	0.387419387	1.143037202	0.046208353
512	SMA	0	8/15/14	23	0.361957796	0.355524458	2.171746778	0.061621162
513	SMA	0	8/16/14	0	0.307571898	0.297954332	1.845431388	0.048577251
514	SMA	0	8/16/14	1	0.514595376	0.514269068	3.087572258	0.118095873
515	SMA	0	8/16/14	2	0.649086601	0.645039535	3.894519606	0.018030869
516	SMA	0	8/16/14	3	0.568745672	0.570881527	3.412474031	0.060867907
517	SMA	0	8/16/14	4	0.428099644	0.427676515	1.284298933	0.016371037
518	SMA	0	8/17/14	22	0.314951476	0.315031221	0.944854429	0.028267778
519	SMA	0	8/17/14	23	0.379819473	0.372521396	2.27891684	0.070448363
520	SMA	0	8/18/14	0	0.324334231	0.324069028	1.946005385	0.04139049
521	SMA	0	8/18/14	1	0.456750583	0.458404303	2.740503498	0.042710643
522	SMA	0	8/18/14	2	0.523634568	0.521046169	3.141807406	0.023859726
523	SMA	0	8/18/14	3	0.477762791	0.479601873	2.866576748	0.062114962
524	SMA	0	8/18/14	4	0.429502327	0.431607026	2.57701396	0.010227802
525	SMA	0	8/18/14	22	0.400128915	0.400500772	1.200386746	0.050462633
526	SMA	0	8/18/14	23	0.454042615	0.450387792	2.724255691	0.068726279
527	SMA	0	8/19/14	0	0.340793557	0.345070264	2.044761342	0.057965137
528	SMA	0	8/19/14	1	0.529338506	0.529541149	3.176031034	0.015506613
529	SMA	0	8/19/14	2	0.565831431	0.567359055	3.394988589	0.022779117
530	SMA	0	8/19/14	3	0.504306921	0.500679261	3.025841527	0.023242611
531	SMA	0	8/19/14	4	0.447441144	0.446214399	2.684646867	0.016450562
532	SMA	0	8/20/14	22	0.425776195	0.426414186	1.277328585	0.023023426
533	SMA	0	8/20/14	23	0.333048866	0.336301788	1.998293196	0.023545417
534	SMA	0	8/21/14	0	0.250783371	0.248244158	1.504700223	0.023192939
535	SMA	0	8/21/14	1	0.235907345	0.235695233	1.41544407	0.014028738
536	SMA	0	8/21/14	2	0.315564829	0.316715289	1.893388972	0.024173831
537	SMA	0	8/21/14	3	0.430684759	0.426906175	2.584108552	0.053775497
538	SMA	0	8/21/14	4	0.35481462	0.354430041	2.12888772	0.00859105
539	SMA	0	8/21/14	22	0.862472216	0.863170576	2.587416647	0.012596987
540	SMA	0	8/21/14	23	0.374527332	0.375361492	2.24716399	0.035594067
541	SMA	0	8/22/14	0	0.24140928	0.23588636	1.448455681	0.036352228
542	SMA	0	8/22/14	1	0.260768349	0.259890297	1.564610095	0.01555257
543	SMA	0	8/22/14	2	0.296683213	0.295532468	1.78009928	0.037563854
544	SMA	0	8/22/14	3	0.350002416	0.34871698	2.100014494	0.012589618
545	SMA	0	8/22/14	4	0.299943705	0.301848125	1.799662228	0.015444438
546	SMA	0	8/25/14	22	0.27851028	0.280276192	0.835530839	0.023092222
547	SMA	0	8/25/14	23	0.286944641	0.288446251	1.721667845	0.020007506
548	SMA	0	8/26/14	0	0.22999319	0.229973686	1.379959137	0.011276762
549	SMA	0	8/26/14	1	0.32145837	0.327841583	1.928750221	0.027241616
550	SMA	0	8/26/14	2	0.383466653	0.383913406	2.30079992	0.023431711
551	SMA	0	8/26/14	3	0.341930317	0.343203119	2.051581901	0.031880636
552	SMA	0	8/26/14	4	0.300196385	0.300903153	1.80117831	0.015162616
553	SMA	0	8/26/14	22	0.229694803	0.230282052	0.68908441	0.016635542
554	SMA	0	8/26/14	23	0.233159443	0.234065193	1.398956656	0.01724607
555	SMA	0	8/27/14	0	0.230658202	0.223679974	1.38394921	0.025069574
556	SMA	0	8/27/14	1	0.237970086	0.237754273	1.427820515	0.013726087
557	SMA	0	8/27/14	2	0.315377997	0.314975217	1.89226798	0.029781291
558	SMA	0	8/27/14	3	0.263157721	0.263081342	1.578946327	0.027361528
559	SMA	0	8/27/14	4	0.267516483	0.266305101	1.6050989	0.012550136
560	SMA	0	8/28/14	22	0.223777352	0.225265471	0.671332057	0.019448395
561	SMA	0	8/28/14	23	0.195953829	0.192882386	1.175722973	0.019783059
562	SMA	0	8/29/14	0	0.155417833	0.154285797	0.932506997	0.011457047
563	SMA	0	8/29/14	1	0.190135661	0.190734812	1.140813965	0.011145294
564	SMA	0	8/29/14	2	0.21095827	0.210816428	1.26574962	0.026522382
565	SMA	0	8/29/14	3	0.241710984	0.243182698	1.450265907	0.029162084
566	SMA	0	8/29/14	4	0.300432287	0.303391131	1.80259372	0.058225204
567	SMA	0	8/29/14	21	0.241555862	0.244086382	0.724667587	0.011834189
568	SMA	0	8/29/14	22	0.265802765	0.258283687	1.594816589	0.069362904
569	SMA	0	8/29/14	23	0.195463336	0.19344576	1.172780016	0.019759261
570	SMA	0	8/30/14	0	0.174030342	0.174373523	1.044182051	0.009115732
571	SMA	0	8/30/14	1	0.171657439	0.171428441	1.029944634	0.016039284
572	SMA	0	8/30/14	2	0.197573476	0.198811348	1.185440858	0.013330365
573	SMA	0	8/30/14	3	0.222441997	0.222406753	1.334651983	0.011931491
574	SMA	0	8/30/14	4	0.212939663	0.212908972	0.638818988	0.011918935
575	SMA	0	8/30/14	21	0.299594187	0.30069017	0.898782562	0.008620897
576	SMA	0	8/30/14	22	0.280243196	0.286476429	1.681459178	0.03298893
577	SMA	0	8/30/14	23	0.253202595	0.257660143	1.519215569	0.029373735
578	SMA	0	8/31/14	0	0.178026624	0.178193765	1.068159745	0.01211977
579	SMA	0	8/31/14	1	0.178630597	0.17875425	1.07178358	0.010543693
580	SMA	0	8/31/14	2	0.185138198	0.185312238	1.110829188	0.016457596
581	SMA	0	8/31/14	3	0.192645805	0.193873412	1.155874831	0.01438178
582	SMA	0	8/31/14	4	0.187325635	0.186507871	0.561976906	0.013269631
583	SMA	0	9/1/14	21	0.740786573	0.741296965	2.22235972	0.009535848
584	SMA	0	9/1/14	22	0.455313805	0.463098037	2.731882828	0.124031272
585	SMA	0	9/1/14	23	0.226383025	0.219632059	1.358298152	0.035752899
586	SMA	0	9/2/14	0	0.197021483	0.197120235	1.182128897	0.01308215
587	SMA	0	9/2/14	1	0.175592775	0.175595645	1.053556651	0.011511391
588	SMA	0	9/2/14	2	0.172057265	0.17209085	1.032343593	0.009255947
589	SMA	0	9/2/14	3	0.18591776	0.186120561	1.115506557	0.011670956
590	SMA	0	9/2/14	4	0.200047953	0.200021233	0.60014386	0.013831897
591	SMA	0	9/3/14	21	0.563799805	0.565926579	1.691399415	0.018408465
592	SMA	0	9/3/14	22	0.528015484	0.529511356	3.168092902	0.018777738
593	SMA	0	9/3/14	23	0.561367745	0.562500019	3.36820647	0.017418254
594	SMA	0	9/4/14	0	0.577899074	0.5782697	3.467394445	0.025376171
595	SMA	0	9/4/14	1	0.52662832	0.52824368	3.159769917	0.018500324
596	SMA	0	9/4/14	2	0.622254625	0.623078658	3.73352775	0.068742314
597	SMA	0	9/4/14	3	0.588376433	0.586821192	3.5302586	0.08006602
598	SMA	0	9/4/14	4	0.334496401	0.335897646	1.003489204	0.018375578
599	SMA	0	9/4/14	21	0.478570129	0.484598921	1.435710387	0.029323249
600	SMA	0	9/4/14	22	0.364590314	0.360176529	2.187541886	0.039236828
601	SMA	0	9/4/14	23	0.285847182	0.277331617	1.715083091	0.042902652
602	SMA	0	9/5/14	0	0.259716596	0.261124044	1.558299574	0.014862352
603	SMA	0	9/5/14	1	0.262955388	0.264176751	1.577732325	0.017141071
604	SMA	0	9/5/14	2	0.270388949	0.267737535	1.622333692	0.028616169
605	SMA	0	9/5/14	3	0.262552253	0.263964894	1.575313518	0.016160583
606	SMA	0	9/5/14	4	0.21938254	0.22086129	0.658147619	0.014050989
607	SMA	0	9/5/14	21	0.235818347	0.237259443	0.70745504	0.014712764
608	SMA	0	9/5/14	22	0.254885464	0.255884685	1.529312782	0.020300914
609	SMA	0	9/5/14	23	0.222983809	0.224652324	1.337902853	0.015074945
610	SMA	0	9/6/14	0	0.229258424	0.230628986	1.375550546	0.013875108
611	SMA	0	9/6/14	1	0.231584086	0.232844355	1.389504517	0.013311746
612	SMA	0	9/6/14	2	0.221477782	0.222887434	1.32886669	0.01225136
613	SMA	0	9/6/14	3	0.232804507	0.234544761	1.39682704	0.013223837
614	SMA	0	9/6/14	4	0.240594862	0.24254058	0.721784587	0.012593005
615	SMA	0	9/6/14	21	0.225633168	0.226752219	0.676899503	0.014657907
616	SMA	0	9/6/14	22	0.224371759	0.225226133	1.346230554	0.015933042
617	SMA	0	9/6/14	23	0.215442293	0.215401117	1.292653758	0.015349855
618	SMA	0	9/7/14	0	0.203860178	0.205022333	1.223161066	0.012209946
619	SMA	0	9/7/14	1	0.214360976	0.215524001	1.286165858	0.013279919
620	SMA	0	9/7/14	2	0.215349274	0.216596064	1.292095643	0.013004073
621	SMA	0	9/7/14	3	0.218131122	0.219402993	1.308786733	0.011724888
622	SMA	0	9/7/14	4	0.204734538	0.205307612	1.22840723	0.012437558
623	SMA	0	9/7/14	21	0.179258153	0.180349717	0.537774459	0.01163619
624	SMA	0	9/7/14	22	0.197627307	0.198976359	1.185763843	0.01226769
625	SMA	0	9/7/14	23	0.204865088	0.201134936	1.229190527	0.023282536
626	SMA	0	9/8/14	0	0.207145814	0.207769554	1.242874885	0.01808735
627	SMA	0	9/8/14	1	0.180333379	0.181832671	1.082000277	0.011881493
628	SMA	0	9/8/14	2	0.191394243	0.192816327	1.148365457	0.012090592
629	SMA	0	9/8/14	3	0.182208458	0.183138649	1.093250747	0.010609341
630	SMA	0	9/8/14	4	0.182860726	0.182982491	1.097164354	0.011723184
631	SMA	0	9/8/14	21	0.188246812	0.189693088	0.564740435	0.010197417
632	SMA	0	9/8/14	22	0.23734303	0.230648653	1.424058181	0.034375297
633	SMA	0	9/8/14	23	0.197869041	0.196326271	1.187214248	0.014377463
634	SMA	0	9/9/14	0	0.197427785	0.198666609	1.184566712	0.010431446
635	SMA	0	9/9/14	1	0.192641191	0.193524986	1.155847147	0.011304897
636	SMA	0	9/9/14	2	0.198608443	0.199556561	1.191650661	0.013001503
637	SMA	0	9/9/14	3	0.194586588	0.195367259	1.167519529	0.012051591
638	SMA	0	9/9/14	4	0.205864163	0.206796969	1.235184977	0.011142308
639	SMA	0	9/9/14	21	0.216607768	0.217969408	0.649823304	0.013242403
640	SMA	0	9/9/14	22	0.198634371	0.199698004	1.191806223	0.013668963
641	SMA	0	9/9/14	23	0.172573986	0.172828002	1.035443916	0.01094391
642	SMA	0	9/10/14	0	0.185315661	0.185466429	1.111893964	0.011955579
643	SMA	0	9/10/14	1	0.200223084	0.200481406	1.201338503	0.011802941
644	SMA	0	9/10/14	2	0.203462852	0.202368736	1.220777114	0.011491487
645	SMA	0	9/10/14	3	0.191764473	0.191666248	0.575293419	0.013638251
646	SMA	0	9/10/14	21	0.28508215	0.286013215	0.855246449	0.013634356
647	SMA	0	9/10/14	22	0.28032425	0.281341568	1.681945502	0.015959744
648	SMA	0	9/10/14	23	0.232563145	0.230169017	1.39537887	0.018209745
649	SMA	0	9/11/14	0	0.217062834	0.217896916	0.651188501	0.01241083
650	SMA	0	6/30/15	21	0.280763797	0.278918106	0.842291392	0.014288886
651	SMA	0	6/30/15	22	0.379369038	0.379500029	2.276214229	0.05771909
652	SMA	0	6/30/15	23	0.551028985	0.55405916	3.30617391	0.030187302
653	SMA	0	7/1/15	0	0.691951604	0.690077843	4.151709623	0.02139126
654	SMA	0	7/1/15	1	0.905401882	0.90640177	5.432411295	0.048545849
655	SMA	0	7/1/15	2	0.941801208	0.941135549	5.65080725	0.017758913
656	SMA	0	7/1/15	3	0.945234091	0.94493041	5.671404544	0.010098489
657	SMA	0	7/1/15	4	0.468178097	0.473625639	2.809068583	0.163970935
658	SMA	0	7/1/15	5	0.291106995	0.287593131	0.873320986	0.025656372
659	SMA	0	7/1/15	21	0.253095541	0.252109312	0.759286622	0.015969406
660	SMA	0	7/1/15	22	0.327514772	0.326969975	1.965088631	0.045036254
661	SMA	0	7/1/15	23	0.503699358	0.510939675	3.022196145	0.065218837
662	SMA	0	7/2/15	0	0.897923883	0.868793811	5.3875433	0.172310925
663	SMA	0	7/2/15	1	0.934796398	0.912719765	5.608778386	0.055877018
664	SMA	0	7/2/15	2	0.894072944	0.886532524	5.364437664	0.029224665
665	SMA	0	7/2/15	3	0.837667326	0.835415139	5.026003955	0.115582551
666	SMA	0	7/2/15	4	0.270798647	0.273754504	1.624791882	0.056345159
667	SMA	0	7/2/15	5	0.22163169	0.219461217	0.664895071	0.019445523
668	SMA	0	7/2/15	21	0.266351927	0.264115766	0.799055782	0.011690683
669	SMA	0	7/2/15	22	0.436500954	0.439574076	2.619005721	0.101783666
670	SMA	0	7/2/15	23	0.669829307	0.669139421	4.018975844	0.056483118
671	SMA	0	7/3/15	0	0.77913391	0.782677444	4.674803459	0.035275019
672	SMA	0	7/3/15	1	0.89672261	0.897264594	5.380335658	0.022275763
673	SMA	0	7/3/15	2	1.030560327	1.029149926	6.18336196	0.021418071
674	SMA	0	7/3/15	3	0.898323702	0.901160639	5.389942213	0.019800129
675	SMA	0	7/3/15	4	0.350345895	0.354188266	2.102075373	0.133199597
676	SMA	0	7/3/15	5	0.233236767	0.231146297	0.6997103	0.0231369
677	SMA	0	7/3/15	21	0.269703783	0.267166037	0.809111348	0.014361943
678	SMA	0	7/3/15	22	0.683388554	0.684724398	4.100331326	0.353955636
679	SMA	0	7/3/15	23	1.332440033	1.335443626	7.994640196	0.127570055
680	SMA	0	7/4/15	0	1.201764461	1.203390614	7.210586767	0.015233141
681	SMA	0	7/4/15	1	1.310783772	1.313347555	7.864702632	0.049631109
682	SMA	0	7/4/15	2	1.067464545	1.069419328	6.40478727	0.02279415
683	SMA	0	7/4/15	3	1.08469194	1.082647415	6.508151639	0.021786571
684	SMA	0	7/4/15	4	0.334527058	0.33783152	2.007162347	0.136338473
685	SMA	0	7/4/15	5	0.196045975	0.193988981	0.588137926	0.011123843
686	SMA	0	7/4/15	21	0.233702317	0.232001793	0.701106952	0.01608513
687	SMA	0	7/4/15	22	0.520912108	0.521146973	3.125472649	0.246428455
688	SMA	0	7/4/15	23	1.561357846	1.566837083	9.368147075	0.23101621
689	SMA	0	7/5/15	0	1.587669938	1.598339899	9.526019628	0.034844033
690	SMA	0	7/5/15	1	1.544322024	1.543077472	9.265932142	0.060125492
691	SMA	0	7/5/15	2	1.682582805	1.684721338	10.09549683	0.014887797
692	SMA	0	7/5/15	3	1.35070171	1.331824057	8.104210262	0.461206601
693	SMA	0	7/5/15	4	0.314307179	0.318335645	1.885843074	0.115309728
694	SMA	0	7/5/15	5	0.22613038	0.223824004	0.678391139	0.021895985
695	SMA	0	7/5/15	21	0.226369292	0.22497406	0.679107877	0.015460709
696	SMA	0	7/5/15	22	0.531965217	0.531228615	3.191791301	0.249375972
697	SMA	0	7/5/15	23	1.384399024	1.378021482	8.306394143	0.073823377
698	SMA	0	7/6/15	0	1.866555472	1.867531441	11.19933283	0.016676464
699	SMA	0	7/6/15	1	1.603366909	1.60121754	9.620201453	0.074196843
700	SMA	0	7/6/15	2	1.405499119	1.41136318	8.432994716	0.045307906
701	SMA	0	7/6/15	3	1.299493871	1.303562549	7.796963228	0.034103685
702	SMA	0	7/6/15	4	0.532549748	0.533950208	3.19529849	0.283028848
703	SMA	0	7/6/15	5	0.217830612	0.21668806	0.653491835	0.016122898
704	SMA	0	7/6/15	21	0.275510583	0.273027324	0.826531749	0.014941302
705	SMA	0	7/6/15	22	0.595987967	0.592974716	3.575927799	0.28690618
706	SMA	0	7/6/15	23	1.63597602	1.626461543	9.815856121	0.133167569
707	SMA	0	7/7/15	0	2.085317595	2.072244781	12.51190557	0.153265429
708	SMA	0	7/7/15	1	2.008216241	2.013639373	12.04929745	0.126393804
709	SMA	0	7/7/15	2	1.881535941	1.871646731	11.28921565	0.044063446
710	SMA	0	7/7/15	3	1.308012256	1.304859055	7.848073536	0.128743425
711	SMA	0	7/7/15	4	0.359822569	0.363739549	2.158935416	0.115504331
712	SMA	0	7/7/15	5	0.251345307	0.247648682	0.754035921	0.011963287
713	SMA	0	7/7/15	21	0.26260892	0.25980555	0.787826759	0.011627619
714	SMA	0	7/7/15	22	0.591358005	0.59311279	3.548148032	0.210782097
715	SMA	0	7/7/15	23	1.151053483	1.158847022	6.906320897	0.140972624
716	SMA	0	7/8/15	0	1.778033961	1.790545843	10.66820376	0.123884088
717	SMA	0	7/8/15	1	1.878062923	1.888610484	11.26837754	0.141364333
718	SMA	0	7/8/15	2	1.814802074	1.811553671	10.88881244	0.129693643
719	SMA	0	7/8/15	3	1.110399766	1.108646681	6.662398598	0.324286222
720	SMA	0	7/8/15	4	0.364994823	0.36664628	2.189968939	0.093300873
721	SMA	0	7/8/15	5	0.275535174	0.272640828	0.826605522	0.009987038
722	SMA	0	7/8/15	21	0.340628582	0.338365665	1.021885747	0.022154778
723	SMA	0	7/8/15	22	0.408544501	0.408846031	2.451267008	0.151112687
724	SMA	0	7/8/15	23	0.818270379	0.821875119	4.909622272	0.129349372
725	SMA	0	7/9/15	0	1.145678551	1.148522722	6.874071304	0.047625414
726	SMA	0	7/9/15	1	1.288481584	1.288391748	7.730889502	0.018645474
727	SMA	0	7/9/15	2	1.392072872	1.394941743	8.35243723	0.009769427
728	SMA	0	7/9/15	3	1.222255429	1.223424253	7.333532573	0.221509946
729	SMA	0	7/9/15	4	0.388258796	0.387837846	2.329552778	0.118468706
730	SMA	0	7/9/15	5	0.290760717	0.287311436	0.87228215	0.021520189
731	SMA	0	7/9/15	21	0.23544476	0.233800672	0.70633428	0.013197382
732	SMA	0	7/9/15	22	0.521367485	0.523976694	3.128204907	0.18886895
733	SMA	0	7/9/15	23	1.144318102	1.143452407	6.865908609	0.142275849
734	SMA	0	7/10/15	0	1.632507615	1.636042765	9.795045692	0.06487088
735	SMA	0	7/10/15	1	1.984345784	1.982162174	11.9060747	0.005934933
736	SMA	0	7/10/15	2	2.145928121	2.146233331	12.87556872	0.077902713
737	SMA	0	7/10/15	3	1.846321769	1.83855157	11.07793061	0.06364909
738	SMA	0	7/10/15	4	0.630696802	0.636691895	3.784180811	0.325927805
739	SMA	0	7/10/15	5	0.273630984	0.271558674	0.820892953	0.0235258
740	SMA	0	7/10/15	21	0.263184462	0.261729932	0.789553385	0.01295971
741	SMA	0	7/10/15	22	0.504531457	0.498154868	3.027188739	0.110409127
742	SMA	0	7/10/15	23	1.007095945	1.00628414	6.042575673	0.052469548
743	SMA	0	7/11/15	0	1.443742389	1.44329126	8.662454333	0.061052851
744	SMA	0	7/11/15	1	1.457367065	1.468521325	8.744202389	0.055850009
745	SMA	0	7/11/15	2	1.510631366	1.519011436	9.063788194	0.178621082
746	SMA	0	7/11/15	3	1.191962023	1.188832326	7.15177214	0.142511477
747	SMA	0	7/11/15	4	0.48590925	0.484732663	2.915455502	0.233820089
748	SMA	0	7/11/15	5	0.304072402	0.299300299	0.912217207	0.036813687
749	SMA	0	7/11/15	21	0.283310892	0.281111183	0.849932676	0.016114925
750	SMA	0	7/11/15	22	0.390204703	0.386081388	2.341228215	0.091723156
751	SMA	0	7/11/15	23	0.954350998	0.947946876	5.726105991	0.273425679
752	SMA	0	7/12/15	0	1.60021608	1.597927854	9.601296477	0.053186272
753	SMA	0	7/12/15	1	1.816201273	1.795460243	10.89720764	0.30357046
754	SMA	0	7/12/15	2	1.578768821	1.592426349	9.472612925	0.049843436
755	SMA	0	7/12/15	3	1.305791658	1.313698737	7.83474995	0.189762716
756	SMA	0	7/12/15	4	0.351834489	0.35701139	2.111006934	0.127577518
757	SMA	0	7/12/15	5	0.26835904	0.264889461	0.805077119	0.031951248
758	SMA	0	7/12/15	21	0.293336865	0.290355912	0.880010596	0.01376387
759	SMA	0	7/12/15	22	0.422846742	0.421136776	2.537080453	0.092384491
760	SMA	0	7/12/15	23	1.00456132	1.003201855	6.027367923	0.158960551
761	SMA	0	7/13/15	0	1.246117848	1.248429129	7.476707086	0.190452579
762	SMA	0	7/13/15	1	1.421354	1.422892345	8.528124001	0.043411568
763	SMA	0	7/13/15	2	1.466614931	1.470617305	8.799689589	0.068085622
764	SMA	0	7/13/15	3	1.110580794	1.108112466	6.663484763	0.185132417
765	SMA	0	7/13/15	4	0.424582193	0.430711178	2.547493161	0.132569924
766	SMA	0	7/13/15	5	0.260658293	0.258649078	0.781974878	0.018447635
767	SMA	0	7/13/15	21	0.372274795	0.368356011	1.116824385	0.015131554
768	SMA	0	7/13/15	22	0.496768918	0.485806783	2.980613506	0.063453576
769	SMA	0	7/13/15	23	0.806109149	0.815074978	4.836654896	0.156807306
770	SMA	0	7/14/15	0	1.133916689	1.129562467	6.803500134	0.17273144
771	SMA	0	7/14/15	1	1.275750751	1.272362578	7.654504508	0.105045562
772	SMA	0	7/14/15	2	1.310579509	1.312632091	7.863477056	0.020671877
773	SMA	0	7/14/15	3	1.207187213	1.193542541	7.243123276	0.260242479
774	SMA	0	7/14/15	4	0.368661899	0.37428987	2.211971392	0.122437919
775	SMA	0	7/14/15	5	0.231201086	0.228873163	1.387206514	0.017391096
776	SMA	0	7/14/15	21	0.351319275	0.349533211	1.053957826	0.014936829
777	SMA	0	7/14/15	22	0.363292999	0.366215015	2.179757993	0.037227162
778	SMA	0	7/14/15	23	0.57879443	0.578933555	3.472766578	0.088389959
779	SMA	0	7/15/15	0	0.880746528	0.882622688	5.284479167	0.022842187
780	SMA	0	7/15/15	1	0.920947392	0.922312716	5.525684351	0.02054705
781	SMA	0	7/15/15	2	1.092114085	1.096405335	6.552684513	0.058117069
782	SMA	0	7/15/15	3	0.855248651	0.856616956	5.131491906	0.021626489
783	SMA	0	7/15/15	4	0.325841388	0.328961689	1.955048328	0.043969598
784	SMA	0	7/15/15	5	0.2828635	0.276981596	1.697181003	0.023966879
785	SMA	0	7/15/15	21	0.799419945	0.79758013	2.398259836	0.021420935
786	SMA	0	7/15/15	22	0.769303873	0.775920842	4.61582324	0.024893546
787	SMA	0	7/15/15	23	0.729957494	0.73163115	4.379744965	0.012689379
788	SMA	0	7/16/15	0	0.655314307	0.657215859	3.931885839	0.025660067
789	SMA	0	7/16/15	1	0.710615297	0.709410822	4.263691784	0.020116482
790	SMA	0	7/16/15	2	0.725989052	0.726591496	4.355934315	0.0200773
791	SMA	0	7/16/15	3	0.696619713	0.696465474	4.179718278	0.0521758
792	SMA	0	7/16/15	4	0.54765714	0.553973558	3.285942837	0.031366857
793	SMA	0	7/16/15	5	0.608067674	0.604640497	3.648406043	0.025959031
794	SMA	0	7/16/15	21	0.788058524	0.784313663	2.364175573	0.010724545
795	SMA	0	7/16/15	22	0.662815841	0.661762018	3.976895044	0.009893446
796	SMA	0	7/16/15	23	0.712791583	0.714154538	4.276749501	0.021918054
797	SMA	0	7/17/15	0	0.702265664	0.704573952	4.213593985	0.018476983
798	SMA	0	7/17/15	1	0.679930824	0.679687461	4.079584943	0.015467705
799	SMA	0	7/17/15	2	0.699551169	0.701125232	4.197307016	0.012460475
800	SMA	0	7/17/15	3	0.661384617	0.66120588	3.968307701	0.00636632
801	SMA	0	7/17/15	4	0.588458224	0.586846435	3.530749343	0.011099924
802	SMA	0	7/17/15	5	0.522944679	0.517304648	3.137668074	0.028815107
803	SMA	0	7/17/15	21	0.356763269	0.354412579	1.070289807	0.020423235
804	SMA	0	7/17/15	22	0.356815666	0.356777603	2.140893995	0.029512667
805	SMA	0	7/17/15	23	0.526760145	0.523197054	3.160560868	0.072849173
806	SMA	0	7/18/15	0	0.590620776	0.592389284	3.543724657	0.041577393
807	SMA	0	7/18/15	1	0.620330189	0.618274246	3.721981134	0.034417658
808	SMA	0	7/18/15	2	0.62351984	0.623356143	3.74111904	0.020150426
809	SMA	0	7/18/15	3	0.469298398	0.469990305	2.815790387	0.05752048
810	SMA	0	7/18/15	4	0.354986183	0.359805101	2.129917099	0.018132123
811	SMA	0	7/18/15	5	0.324416774	0.321831273	1.946500645	0.020464147
812	SMA	0	7/18/15	21	0.352654114	0.348954096	1.057962342	0.013229959
813	SMA	0	7/18/15	22	0.509139437	0.511002842	3.054836619	0.100229761
814	SMA	0	7/18/15	23	0.866256981	0.867298708	5.197541884	0.028403058
815	SMA	0	7/19/15	0	0.934786608	0.938451271	5.608719649	0.026223217
816	SMA	0	7/19/15	1	1.000192937	1.006781501	6.00115762	0.08483281
817	SMA	0	7/19/15	2	0.870990284	0.873682709	5.225941703	0.020586345
818	SMA	0	7/19/15	3	0.799224252	0.798751831	4.795345515	0.02128647
819	SMA	0	7/19/15	4	0.409321737	0.413662461	2.455930421	0.033474288
820	SMA	0	7/19/15	5	0.395647342	0.391735183	2.373884052	0.013033987
821	SMA	0	7/19/15	21	0.400762278	0.400670179	1.202286835	0.01123257
822	SMA	0	7/19/15	22	0.565469532	0.565025388	3.392817194	0.163655216
823	SMA	0	7/19/15	23	0.874055687	0.873303641	5.24433412	0.121290208
824	SMA	0	7/20/15	0	0.902740284	0.897556281	5.416441706	0.046113275
825	SMA	0	7/20/15	1	0.971269303	0.975581641	5.827615819	0.030310207
826	SMA	0	7/20/15	2	0.907462413	0.90814041	5.444774478	0.010493812
827	SMA	0	7/20/15	3	0.747382524	0.748092156	4.484295142	0.085171933
828	SMA	0	7/20/15	4	0.362745005	0.366581695	2.176470032	0.047178621
829	SMA	0	7/20/15	5	0.327005531	0.322774284	1.962033184	0.019681307
830	SMA	0	7/20/15	21	0.246262376	0.244331295	0.738787128	0.01596841
831	SMA	0	7/20/15	22	0.268159678	0.267592706	1.608958068	0.047634974
832	SMA	0	7/20/15	23	0.411569709	0.413955952	2.469418253	0.026310726
833	SMA	0	7/21/15	0	0.643463759	0.636236312	3.860782552	0.029756918
834	SMA	0	7/21/15	1	0.708072134	0.712319092	4.248432806	0.037477847
835	SMA	0	7/21/15	2	0.913813023	0.91174161	5.482878135	0.078157859
836	SMA	0	7/21/15	3	0.723468229	0.722897564	4.340809374	0.011607594
837	SMA	0	7/21/15	4	0.374603796	0.375383996	2.247622776	0.084383476
838	SMA	0	7/21/15	5	0.295674291	0.292818469	1.774045748	0.030695838
839	SMA	0	7/21/15	21	0.260862993	0.260099534	0.78258898	0.01320128
840	SMA	0	7/21/15	22	0.295329215	0.295500657	1.771975291	0.039954406
841	SMA	0	7/21/15	23	0.569008371	0.57299213	3.414050226	0.021152028
842	SMA	0	7/22/15	0	0.548283154	0.548105874	3.289698924	0.071685391
843	SMA	0	7/22/15	1	0.811510277	0.812971153	4.869061662	0.1121485
844	SMA	0	7/22/15	2	0.860837424	0.86299847	5.165024545	0.027495014
845	SMA	0	7/22/15	3	0.622187235	0.619113647	3.733123411	0.069400908
846	SMA	0	7/22/15	4	0.3733612	0.378616861	2.240167202	0.045196718
847	SMA	0	7/22/15	5	0.333542135	0.33138891	2.001252811	0.024624011
848	SMA	0	7/22/15	21	0.276778494	0.274905701	0.830335483	0.01768666
849	SMA	0	7/22/15	22	0.236185278	0.23873946	1.417111669	0.014309909
850	SMA	0	7/22/15	23	0.320435263	0.321080402	1.922611579	0.0227844
851	SMA	0	7/23/15	0	0.471835446	0.472651653	2.831012677	0.072988544
852	SMA	0	7/23/15	1	0.623177841	0.621828637	3.739067045	0.033180957
853	SMA	0	7/23/15	2	0.622379691	0.620466832	3.734278143	0.037254182
854	SMA	0	7/23/15	3	0.515254613	0.515539771	3.09152768	0.021599465
855	SMA	0	7/23/15	4	0.307996064	0.312149299	1.847976386	0.052782478
856	SMA	0	7/23/15	5	0.279013884	0.278669537	1.674083305	0.028472783
857	SMA	0	7/23/15	21	0.231861523	0.23047393	0.69558457	0.010809117
858	SMA	0	7/23/15	22	0.301316881	0.305023386	1.807901289	0.085983044
859	SMA	0	7/23/15	23	0.755600185	0.758451013	4.533601112	0.058389066
860	SMA	0	7/24/15	0	0.841055086	0.840092721	5.046330516	0.111295376
861	SMA	0	7/24/15	1	1.205195619	1.20720418	7.231173713	0.028665719
862	SMA	0	7/24/15	2	1.203671824	1.203597426	7.222030942	0.016097923
863	SMA	0	7/24/15	3	1.116757754	1.11862341	6.700546527	0.220820935
864	SMA	0	7/24/15	4	0.428258525	0.431555007	2.569551151	0.167649585
865	SMA	0	7/24/15	5	0.269008766	0.266535836	1.614052594	0.028288586
866	SMA	0	7/24/15	21	0.256021606	0.255158127	0.768064818	0.015138216
867	SMA	0	7/24/15	22	0.271786754	0.272098221	1.630720526	0.034860128
868	SMA	0	7/24/15	23	0.388582914	0.38472427	2.331497485	0.051327127
869	SMA	0	7/25/15	0	0.565568502	0.567569048	3.393411012	0.175097044
870	SMA	0	7/25/15	1	1.022495845	1.024227847	6.134975067	0.015166691
871	SMA	0	7/25/15	2	1.160904069	1.16109269	6.965424417	0.017212952
872	SMA	0	7/25/15	3	0.95984546	0.960497195	5.759072759	0.06388873
873	SMA	0	7/25/15	4	0.342497842	0.34065788	2.054987055	0.06613386
874	SMA	0	7/25/15	5	0.293808754	0.290720875	1.762852523	0.027780611
875	SMA	0	7/25/15	21	0.35917766	0.356776774	1.07753298	0.021510778
876	SMA	0	7/25/15	22	0.255697752	0.256085815	1.534186511	0.039663755
877	SMA	0	7/25/15	23	0.374320581	0.377217364	2.245923487	0.042331962
878	SMA	0	7/26/15	0	0.514315317	0.510664512	3.085891903	0.13017488
879	SMA	0	7/26/15	1	0.73345192	0.728550077	4.400711518	0.067854461
880	SMA	0	7/26/15	2	0.810340988	0.806232561	4.862045927	0.085606913
881	SMA	0	7/26/15	3	0.704990482	0.70296677	4.229942895	0.015191657
882	SMA	0	7/26/15	4	0.417644878	0.42021181	2.50586927	0.101600736
883	SMA	0	7/26/15	5	0.35211978	0.346707606	2.112718679	0.032482822
884	SMA	0	7/26/15	21	0.55936097	0.555671704	1.678082909	0.020754989
885	SMA	0	7/26/15	22	0.428247746	0.43110169	2.569486474	0.040776839
886	SMA	0	7/26/15	23	0.362047698	0.36453867	2.17228619	0.04481645
887	SMA	0	7/27/15	0	0.388297072	0.386192268	2.329782432	0.021878837
888	SMA	0	7/27/15	1	0.4086689	0.412518786	2.452013399	0.016123964
889	SMA	0	7/27/15	2	0.559781464	0.560135015	3.358688783	0.01413926
890	SMA	0	7/27/15	3	0.540717023	0.533098645	3.24430214	0.034415352
891	SMA	0	7/27/15	4	0.403638389	0.406038911	2.421830333	0.098596598
892	SMA	0	7/27/15	5	0.315172247	0.311764641	1.891033482	0.02650082
893	SMA	0	7/27/15	21	0.718119589	0.715746507	2.154358768	0.008612886
894	SMA	0	7/27/15	22	0.706587594	0.696733216	4.239525564	0.046660774
895	SMA	0	7/27/15	23	0.588505496	0.588478651	3.531032977	0.008851296
896	SMA	0	7/28/15	0	0.554854299	0.557116814	3.329125793	0.011213499
897	SMA	0	7/28/15	1	0.484445047	0.485430424	2.906670282	0.014737295
898	SMA	0	7/28/15	2	0.504476364	0.504212566	3.026858182	0.012998247
899	SMA	0	7/28/15	3	0.55895334	0.556975374	3.353720039	0.011922362
900	SMA	0	7/28/15	4	0.464276421	0.463657606	2.785658528	0.08071492
901	SMA	0	7/28/15	5	0.409899193	0.401357438	2.459395159	0.079491524
902	SMA	0	7/28/15	21	0.661485291	0.657542089	1.984455873	0.01355855
903	SMA	0	7/28/15	22	0.704454372	0.705165507	4.22672623	0.057721606
904	SMA	0	7/28/15	23	0.633721643	0.628679666	3.802329861	0.028058981
905	SMA	0	7/29/15	0	0.558187809	0.557262779	3.349126855	0.029123038
906	SMA	0	7/29/15	1	0.498830801	0.498532866	2.992984806	0.015712717
907	SMA	0	7/29/15	2	0.506649137	0.508115198	3.039894819	0.016970428
908	SMA	0	7/29/15	3	0.48591935	0.483928293	2.915516097	0.011593067
909	SMA	0	7/29/15	4	0.488921331	0.487326252	2.933527987	0.026898234
910	SMA	0	7/29/15	5	0.570524019	0.566939701	3.423144112	0.03764397
911	SMA	0	7/29/15	21	0.3023724	0.302201059	0.907117201	0.01285635
912	SMA	0	7/29/15	22	0.333731808	0.335346845	2.002390848	0.017255867
913	SMA	0	7/29/15	23	0.331869348	0.334087815	1.991216087	0.012776399
914	SMA	0	7/30/15	0	0.291884104	0.29457344	1.751304626	0.00949884
915	SMA	0	7/30/15	1	0.353644086	0.358795802	2.121864519	0.027680772
916	SMA	0	7/30/15	2	0.362279352	0.362071741	2.173676113	0.007917573
917	SMA	0	7/30/15	3	0.358490888	0.360142984	2.150945329	0.005731224
918	SMA	0	7/30/15	4	0.328538224	0.33176177	1.971229342	0.028061084
919	SMA	0	7/30/15	5	0.315129677	0.309551543	1.890778064	0.035438167
920	SMA	0	7/30/15	21	0.282224808	0.279969982	0.846674423	0.01261742
921	SMA	0	7/30/15	22	0.314420593	0.31254887	1.88652356	0.011695338
922	SMA	0	7/30/15	23	0.319684648	0.320759607	1.918107891	0.012264378
923	SMA	0	7/31/15	0	0.315278178	0.313352338	1.891669067	0.024994974
924	SMA	0	7/31/15	1	0.310766981	0.311026255	1.864601889	0.012456758
925	SMA	0	7/31/15	2	0.341466152	0.341568186	2.048796913	0.043914502
926	SMA	0	7/31/15	3	0.371520373	0.370306162	2.229122238	0.019567137
927	SMA	0	7/31/15	4	0.297177496	0.296171934	1.783064976	0.04230722
928	SMA	0	7/31/15	5	0.218949542	0.211380018	1.313697255	0.043386892
929	SMA	0	7/31/15	21	0.197833761	0.196931713	0.593501282	0.011527926
930	SMA	0	7/31/15	22	0.213178319	0.212777264	1.279069915	0.010647044
931	SMA	0	7/31/15	23	0.320545683	0.314783401	1.923274096	0.019856934
932	SMA	0	8/1/15	0	0.390501394	0.386693484	2.343008367	0.050448801
933	SMA	0	8/1/15	1	0.330268393	0.335509446	1.98161036	0.014951609
934	SMA	0	8/1/15	2	0.272995782	0.271222344	1.637974694	0.006568163
935	SMA	0	8/1/15	3	0.286051049	0.28460299	1.716306292	0.008217713
936	SMA	0	8/1/15	4	0.261048947	0.264575236	1.566293683	0.022191209
937	SMA	0	8/1/15	5	0.190860588	0.181941358	1.14516353	0.032650674
938	SMA	0	8/1/15	21	0.205169334	0.203366935	0.615508002	0.008479618
939	SMA	0	8/1/15	22	0.245765918	0.247821223	1.474595509	0.033860105
940	SMA	0	8/1/15	23	0.320026311	0.319121532	1.920157865	0.041449916
941	SMA	0	8/2/15	0	0.393666167	0.39243767	2.361997002	0.007791669
942	SMA	0	8/2/15	1	0.589378339	0.588785028	3.536270034	0.122359697
943	SMA	0	8/2/15	2	0.446236697	0.444881459	2.677420183	0.060383371
944	SMA	0	8/2/15	3	0.311124195	0.313208197	1.86674517	0.017995039
945	SMA	0	8/2/15	4	0.212484679	0.215334228	1.274908075	0.015783923
946	SMA	0	8/2/15	5	0.192760731	0.18180143	1.156564388	0.039399682
947	SMA	0	8/2/15	21	0.209932346	0.208180586	0.629797037	0.009536728
948	SMA	0	8/2/15	22	0.243591311	0.244003325	1.461547867	0.056100111
949	SMA	0	8/2/15	23	0.426865083	0.427750287	2.561190497	0.013036542
950	SMA	0	8/3/15	0	0.386000494	0.384895182	2.316002962	0.087111363
951	SMA	0	8/3/15	1	0.320144473	0.322331666	1.920866836	0.042074268
952	SMA	0	8/3/15	2	0.301229618	0.298634771	1.807377707	0.028555721
953	SMA	0	8/3/15	3	0.270876406	0.269802889	1.625258434	0.021237048
954	SMA	0	8/3/15	4	0.213536052	0.21565374	1.281216315	0.009157294
955	SMA	0	8/3/15	5	0.248522196	0.245613897	1.491133176	0.015069614
956	SMA	0	8/3/15	21	0.167163576	0.166480788	0.501490728	0.009938632
957	SMA	0	8/3/15	22	0.292801922	0.289341121	1.756811531	0.104398071
958	SMA	0	8/3/15	23	0.536650156	0.530619289	3.219900933	0.071189676
959	SMA	0	8/4/15	0	0.498926322	0.497376311	2.993557929	0.019813598
960	SMA	0	8/4/15	1	0.4228126	0.423454983	2.536875603	0.064866304
961	SMA	0	8/4/15	2	0.303271769	0.301267875	1.819630615	0.018670894
962	SMA	0	8/4/15	3	0.279806916	0.278295821	1.678841498	0.020920692
963	SMA	0	8/4/15	4	0.214415354	0.212823524	1.286492122	0.007482246
964	SMA	0	8/4/15	5	0.22160518	0.216360185	1.329631082	0.027890291
965	SMA	0	8/4/15	21	0.185326931	0.184891857	0.555980793	0.013244564
966	SMA	0	8/4/15	22	0.206000717	0.204044961	1.236004305	0.01731667
967	SMA	0	8/4/15	23	0.239510088	0.239737666	1.437060526	0.038532858
968	SMA	0	8/5/15	0	0.332972029	0.33080164	1.997832171	0.044508873
969	SMA	0	8/5/15	1	0.368637528	0.369142399	2.211825171	0.01430015
970	SMA	0	8/5/15	2	0.428769248	0.431170458	2.572615487	0.083144593
971	SMA	0	8/5/15	3	0.296315815	0.296989086	1.777894891	0.005505648
972	SMA	0	8/5/15	4	0.247343872	0.24700121	1.484063231	0.007063819
973	SMA	0	8/5/15	5	0.243757385	0.243690941	1.46254431	0.014588042
974	SMA	0	8/5/15	21	0.223414606	0.221821718	0.670243818	0.011252615
975	SMA	0	8/5/15	22	0.239869829	0.238292625	1.439218973	0.024686963
976	SMA	0	8/5/15	23	0.313784844	0.314113918	1.882709066	0.011127749
977	SMA	0	8/6/15	0	0.391628151	0.391210521	2.349768906	0.020195448
978	SMA	0	8/6/15	1	0.314059774	0.314261005	1.884358641	0.028654084
979	SMA	0	8/6/15	2	0.35918363	0.360639242	2.155101779	0.030495926
980	SMA	0	8/6/15	3	0.320407174	0.31909576	1.922443043	0.014492236
981	SMA	0	8/6/15	4	0.277198626	0.279440067	1.663191756	0.017007405
982	SMA	0	8/6/15	5	0.284892096	0.277076608	1.709352573	0.049099486
983	SMA	0	8/6/15	21	0.28308354	0.281747727	0.849250621	0.013300805
984	SMA	0	8/6/15	22	0.286423502	0.284351479	0.859270506	0.006459673
985	SMA	0	8/6/15	23	0.284232068	0.283181322	0.852696204	0.0030062
986	SMA	0	8/7/15	0	0.315191637	0.314926705	0.94557491	0.005523343
987	SMA	0	8/7/15	1	0.280062556	0.278979951	0.840187668	0.005133799
988	SMA	0	8/7/15	2	0.28978222	0.288369765	0.86934666	0.005427998
989	SMA	0	8/7/15	3	0.261703551	0.26005709	0.785110653	0.006460993
990	SMA	0	8/7/15	4	0.295219186	0.293490436	0.885657557	0.008269531
991	SMA	0	8/7/15	5	0.34370673	0.339071804	1.031120191	0.023136921
992	SMA	0	8/7/15	20	0.379676231	0.380781681	1.139028693	0.025941676
993	SMA	0	8/7/15	21	0.250843671	0.244654484	1.505062024	0.032004226
994	SMA	0	8/7/15	22	0.2364623	0.236855055	1.418773802	0.010567439
995	SMA	0	8/7/15	23	0.23744154	0.237018965	1.424649241	0.013938308
996	SMA	0	8/8/15	0	0.254073576	0.253227384	1.524441455	0.016850847
997	SMA	0	8/8/15	1	0.295487139	0.295556428	1.772922833	0.012814561
998	SMA	0	8/8/15	2	0.344033782	0.343208857	2.064202694	0.062006708
999	SMA	0	8/8/15	3	0.264177894	0.262370501	1.585067364	0.035732145
1000	SMA	0	8/8/15	4	0.233783113	0.232591883	1.40269868	0.010352863
1001	SMA	0	8/8/15	5	0.282737909	0.27897716	0.848213728	0.02615046
1002	SMA	0	8/8/15	20	0.237245563	0.234820109	0.71173669	0.016187421
1003	SMA	0	8/8/15	21	0.210582808	0.20784312	1.26349685	0.025255797
1004	SMA	0	8/8/15	22	0.231803707	0.23030424	1.390822239	0.006046895
1005	SMA	0	8/8/15	23	0.374634372	0.374491431	2.247806234	0.027071268
1006	SMA	0	8/9/15	0	0.35289943	0.354191752	2.117396579	0.035782495
1007	SMA	0	8/9/15	1	0.343926659	0.344958701	2.063559951	0.054187115
1008	SMA	0	8/9/15	2	0.278266609	0.276293615	1.669599655	0.005639809
1009	SMA	0	8/9/15	3	0.285754937	0.287308089	1.714529622	0.05736235
1010	SMA	0	8/9/15	4	0.228014697	0.226913541	1.368088183	0.007008113
1011	SMA	0	8/9/15	5	0.322942123	0.321700221	0.968826368	0.0314878
1012	SMA	0	8/9/15	20	0.318081206	0.315501768	0.954243619	0.016311507
1013	SMA	0	8/9/15	21	0.249668922	0.251358426	1.498013533	0.014646134
1014	SMA	0	8/9/15	22	0.315012402	0.313056864	1.89007441	0.049648234
1015	SMA	0	8/9/15	23	0.456642863	0.459513937	2.739857176	0.036274969
1016	SMA	0	8/10/15	0	0.640316748	0.625823484	3.841900489	0.109068826
1017	SMA	0	8/10/15	1	0.603262053	0.594533406	3.619572317	0.085912409
1018	SMA	0	8/10/15	2	0.324033485	0.322285599	1.944200911	0.007715811
1019	SMA	0	8/10/15	3	0.28236095	0.282717901	1.694165698	0.016648516
1020	SMA	0	8/10/15	4	0.191956682	0.192114795	1.151740089	0.0269611
1021	SMA	0	8/10/15	5	0.252869449	0.250725186	0.758608347	0.027482647
1022	SMA	0	8/10/15	20	0.282676908	0.280528179	0.848030725	0.010311508
1023	SMA	0	8/10/15	21	0.252818187	0.252105326	1.516909124	0.016354397
1024	SMA	0	8/10/15	22	0.24172838	0.240144708	1.450370281	0.003948326
1025	SMA	0	8/10/15	23	0.251624997	0.250955042	1.509749983	0.005634085
1026	SMA	0	8/11/15	0	0.273151633	0.271428519	1.638909797	0.030569327
1027	SMA	0	8/11/15	1	0.241475093	0.243460912	1.448850558	0.007657331
1028	SMA	0	8/11/15	2	0.237915675	0.236195185	1.427494048	0.011460827
1029	SMA	0	8/11/15	3	0.331361275	0.324100043	1.988167651	0.121183213
1030	SMA	0	8/11/15	4	0.191896105	0.192124625	1.151376629	0.010003301
1031	SMA	0	8/11/15	5	0.248678674	0.246547565	0.746036022	0.020320973
1032	SMA	0	8/11/15	20	0.248877831	0.247980553	0.746633494	0.009221111
1033	SMA	0	8/11/15	21	0.227382699	0.22757862	1.364296196	0.015031098
1034	SMA	0	8/11/15	22	0.291625105	0.293964754	1.749750631	0.045011682
1035	SMA	0	8/11/15	23	0.493779584	0.497264535	2.962677503	0.016421921
1036	SMA	0	8/12/15	0	0.549525457	0.548571987	3.297152743	0.015421579
1037	SMA	0	8/12/15	1	0.401496812	0.398560846	2.408980874	0.065834449
1038	SMA	0	8/12/15	2	0.367872058	0.36797119	2.207232346	0.014475393
1039	SMA	0	8/12/15	3	0.241429592	0.241412893	1.448577555	0.008530572
1040	SMA	0	8/12/15	4	0.17086441	0.169281423	1.025186462	0.009912843
1041	SMA	0	8/12/15	5	0.256959855	0.254295363	0.770879564	0.026853765
1042	SMA	0	8/12/15	20	0.203396388	0.202692676	0.610189163	0.012841362
1043	SMA	0	8/12/15	21	0.162508874	0.162092974	0.975053242	0.008544347
1044	SMA	0	8/12/15	22	0.212452796	0.211576836	1.274716778	0.004966733
1045	SMA	0	8/12/15	23	0.259133487	0.257152622	1.554800924	0.006565163
1046	SMA	0	8/13/15	0	0.35372258	0.353193407	2.122335479	0.018699447
1047	SMA	0	8/13/15	1	0.315396576	0.314645113	1.892379458	0.040086317
1048	SMA	0	8/13/15	2	0.255707894	0.254924946	1.534247365	0.009954863
1049	SMA	0	8/13/15	3	0.17410686	0.17330915	1.04464116	0.009014198
1050	SMA	0	8/13/15	4	0.129755769	0.128561553	0.778534617	0.014098812
1051	SMA	0	8/13/15	5	0.239714917	0.221619508	1.438289499	0.079933015
1052	SMA	0	8/13/15	20	0.219118183	0.219451254	0.657354549	0.011983415
1053	SMA	0	8/13/15	21	0.199048814	0.196376358	1.194292886	0.009710875
1054	SMA	0	8/13/15	22	0.208232927	0.207408472	1.24939756	0.008440527
1055	SMA	0	8/13/15	23	0.294641294	0.29416397	1.767847762	0.011684252
1056	SMA	0	8/14/15	0	0.317692163	0.315544471	1.906152979	0.011171601
1057	SMA	0	8/14/15	1	0.257689219	0.25770698	1.546135313	0.025710981
1058	SMA	0	8/14/15	2	0.23034858	0.230387522	1.382091479	0.006885095
1059	SMA	0	8/14/15	3	0.169004492	0.170261228	1.014026953	0.029612004
1060	SMA	0	8/14/15	4	0.13186076	0.131855142	0.791164561	0.005764058
1061	SMA	0	8/14/15	5	0.183826688	0.182723677	1.102960128	0.017494973
1062	SMA	0	8/14/15	20	0.245146067	0.243880523	0.735438202	0.010071455
1063	SMA	0	8/14/15	21	0.216338314	0.212093657	1.298029882	0.043420984
1064	SMA	0	8/14/15	22	0.23261499	0.231103247	1.395689941	0.02610909
1065	SMA	0	8/14/15	23	0.359384309	0.361784147	2.156305852	0.032645781
1066	SMA	0	8/15/15	0	0.359730456	0.361489396	2.158382735	0.018764122
1067	SMA	0	8/15/15	1	0.315336158	0.313734695	1.89201695	0.005517632
1068	SMA	0	8/15/15	2	0.264445331	0.264698621	1.586671988	0.00538528
1069	SMA	0	8/15/15	3	0.217942345	0.217533505	1.307654071	0.008469942
1070	SMA	0	8/15/15	4	0.185806621	0.182764252	1.114839726	0.009509576
1071	SMA	0	8/15/15	5	0.244441281	0.248320533	1.466647688	0.017614641
1072	SMA	0	8/15/15	20	0.450607084	0.446850844	1.351821251	0.017365842
1073	SMA	0	8/15/15	21	0.346566857	0.34327643	2.079401145	0.08470751
1074	SMA	0	8/15/15	22	0.253238704	0.253866852	1.519432221	0.007911168
1075	SMA	0	8/15/15	23	0.265746338	0.266089347	1.594478027	0.007899133
1076	SMA	0	8/16/15	0	0.293347925	0.293906571	1.760087548	0.013005793
1077	SMA	0	8/16/15	1	0.305819279	0.306216732	1.834915676	0.001562526
1078	SMA	0	8/16/15	2	0.29559934	0.296031247	1.773596042	0.011445998
1079	SMA	0	8/16/15	3	0.286731229	0.286946634	1.720387375	0.00387259
1080	SMA	0	8/16/15	4	0.321352738	0.321310956	1.928116426	0.012235032
1081	SMA	0	8/16/15	5	0.392063638	0.390329701	2.35238183	0.022554726
1082	SMA	0	8/16/15	20	0.298495087	0.296472061	0.89548526	0.014516945
1083	SMA	0	8/16/15	21	0.273332192	0.275941852	1.639993154	0.008665854
1084	SMA	0	8/16/15	22	0.268915936	0.26931003	1.613495615	0.005687918
1085	SMA	0	8/16/15	23	0.280764082	0.281682667	1.684584489	0.017804551
1086	SMA	0	8/17/15	0	0.281920678	0.282044642	1.691524067	0.005800561
1087	SMA	0	8/17/15	1	0.282524689	0.282731866	1.695148132	0.003845341
1088	SMA	0	8/17/15	2	0.2779356	0.276604173	1.667613603	0.016636037
1089	SMA	0	8/17/15	3	0.293480166	0.293179711	1.760880996	0.007393811
1090	SMA	0	8/17/15	4	0.296629916	0.29535717	1.779779493	0.00341128
1091	SMA	0	8/17/15	5	0.310247186	0.316104953	1.861483118	0.037873835
1092	SMA	0	8/17/15	20	0.383964797	0.394793722	1.151894391	0.025592715
1093	SMA	0	8/17/15	21	0.311648873	0.312175651	1.869893235	0.002437341
1094	SMA	0	8/17/15	22	0.337901306	0.337824699	2.027407839	0.031323704
1095	SMA	0	8/17/15	23	0.324575526	0.324713082	1.947453155	0.008345702
1096	SMA	0	8/18/15	0	0.294652077	0.295833113	1.767912464	0.007571441
1097	SMA	0	8/18/15	1	0.341652728	0.340870495	2.049916368	0.011926216
1098	SMA	0	8/18/15	2	0.323452883	0.325222931	1.940717301	0.006861628
1099	SMA	0	8/18/15	3	0.286584289	0.287122474	1.719505735	0.019447788
1100	SMA	0	8/18/15	4	0.269051652	0.268471197	1.614309909	0.005545678
1101	SMA	0	8/18/15	5	0.27359874	0.275251866	1.641592442	0.016260828
1102	SMA	0	8/18/15	20	0.229888014	0.22867511	0.689664043	0.007913547
1103	SMA	0	8/18/15	21	0.243090734	0.241857877	1.458544401	0.008392702
1104	SMA	0	8/18/15	22	0.261941783	0.261995359	1.571650698	0.009216921
1105	SMA	0	8/18/15	23	0.275000216	0.276760747	1.650001297	0.006958036
1106	SMA	0	8/19/15	0	0.307959675	0.304222819	1.847758049	0.024607509
1107	SMA	0	8/19/15	1	0.34885419	0.351930677	2.093125141	0.016461675
1108	SMA	0	8/19/15	2	0.262998447	0.263961461	1.577990679	0.008713273
1109	SMA	0	8/19/15	3	0.26299943	0.262612059	1.577996578	0.004446765
1110	SMA	0	8/19/15	4	0.240372393	0.241265012	1.442234355	0.006910774
1111	SMA	0	8/19/15	5	0.285309917	0.277648639	1.711859503	0.029820368
1112	SMA	0	8/19/15	20	0.304991888	0.303725252	0.914975664	0.013319607
1113	SMA	0	8/19/15	21	0.263434772	0.263950718	1.580608633	0.009359212
1114	SMA	0	8/19/15	22	0.288797727	0.290438312	1.73278636	0.011216905
1115	SMA	0	8/19/15	23	0.302456495	0.303453002	1.814738968	0.018973323
1116	SMA	0	8/20/15	0	0.293433969	0.293629249	1.760603816	0.003789407
1117	SMA	0	8/20/15	1	0.273654087	0.27199575	1.641924524	0.00341904
1118	SMA	0	8/20/15	2	0.275019435	0.27601506	1.650116607	0.003865128
1119	SMA	0	8/20/15	3	0.282346259	0.278936114	1.694077553	0.012225113
1120	SMA	0	8/20/15	4	0.274446809	0.273857098	1.646680855	0.007762239
1121	SMA	0	8/20/15	5	0.321049721	0.314462525	1.926298328	0.024962588
1122	SMA	0	8/20/15	20	0.277029948	0.275034346	0.831089845	0.01561992
1123	SMA	0	8/20/15	21	0.231178474	0.233534055	1.387070842	0.011884701
1124	SMA	0	8/20/15	22	0.239723571	0.242130026	1.438341425	0.009176717
1125	SMA	0	8/20/15	23	0.273247045	0.273799613	1.639482269	0.015372729
1126	SMA	0	8/21/15	0	0.279942018	0.28003076	1.679652107	0.006934974
1127	SMA	0	8/21/15	1	0.268004022	0.268566842	1.608024131	0.003014204
1128	SMA	0	8/21/15	2	0.252355461	0.254626537	1.514132767	0.015370946
1129	SMA	0	8/21/15	3	0.270924488	0.271605238	1.625546926	0.019168767
1130	SMA	0	8/21/15	4	0.277749188	0.277566537	1.66649513	0.005602785
1131	SMA	0	8/21/15	5	0.338263476	0.336810483	2.029580853	0.011193361
1132	SMA	0	8/21/15	6	0.356469456	0.356188113	1.069408369	0.000736078
1133	SMA	0	8/21/15	20	0.29580067	0.298640768	0.88740201	0.010564601
1134	SMA	0	8/21/15	21	0.250122124	0.247812796	1.500732743	0.020651727
1135	SMA	0	8/21/15	22	0.272565756	0.273867516	1.635394536	0.021856791
1136	SMA	0	8/21/15	23	0.293608243	0.291629166	1.761649461	0.018393997
1137	SMA	0	8/22/15	0	0.296156201	0.29631692	1.776937206	0.014258154
1138	SMA	0	8/22/15	1	0.29007794	0.289693349	1.740467639	0.007171392
1139	SMA	0	8/22/15	2	0.287215173	0.287338474	1.723291037	0.001659647
1140	SMA	0	8/22/15	3	0.313286385	0.31387801	1.879718307	0.003936472
1141	SMA	0	8/22/15	4	0.294196745	0.294604046	1.765180467	0.009291554
1142	SMA	0	8/22/15	5	0.355730773	0.35233647	2.134384638	0.015227916
1143	SMA	0	8/22/15	6	0.366714896	0.363514788	1.100144689	0.018951083
1144	SMA	0	8/22/15	20	0.258611851	0.258688639	0.775835552	0.016344292
1145	SMA	0	8/22/15	21	0.221008756	0.220028356	1.326052538	0.0067971
1146	SMA	0	8/22/15	22	0.248299243	0.246545387	1.489795457	0.016473401
1147	SMA	0	8/22/15	23	0.241962501	0.24017438	1.451775005	0.015316152
1148	SMA	0	8/23/15	0	0.251889888	0.250301042	1.511339331	0.008292679
1149	SMA	0	8/23/15	1	0.235071673	0.234732183	1.410430037	0.011897463
1150	SMA	0	8/23/15	2	0.236137969	0.235738304	1.416827816	0.008001138
1151	SMA	0	8/23/15	3	0.218758991	0.219799456	1.312553945	0.007621741
1152	SMA	0	8/23/15	4	0.217273536	0.217280971	1.303641217	0.009733982
1153	SMA	0	8/23/15	5	0.256904656	0.250468975	1.541427937	0.029923632
1154	SMA	0	8/23/15	6	0.259469221	0.257251002	0.778407662	0.031114097
1155	SMA	0	8/23/15	20	0.223996806	0.221033905	0.671990417	0.009951624
1156	SMA	0	8/23/15	21	0.198619713	0.197137242	1.191718279	0.00510399
1157	SMA	0	8/23/15	22	0.195005264	0.194293396	1.170031582	0.00471175
1158	SMA	0	8/23/15	23	0.211932504	0.212559307	1.271595024	0.008003994
1159	SMA	0	8/24/15	0	0.245204375	0.248356632	1.471226248	0.009884112
1160	SMA	0	8/24/15	1	0.240895666	0.242373081	1.445373995	0.031854263
1161	SMA	0	8/24/15	2	0.19912156	0.200511314	1.194729361	0.012179078
1162	SMA	0	8/24/15	3	0.193206416	0.195669694	1.159238494	0.009262404
1163	SMA	0	8/24/15	4	0.201815829	0.199917402	1.210894975	0.018154906
1164	SMA	0	8/24/15	5	0.241281087	0.235022676	1.44768652	0.039672577
1165	SMA	0	8/24/15	6	0.268312746	0.265179682	0.804938238	0.023693778
1166	SMA	0	8/24/15	20	0.246504645	0.245540616	0.739513935	0.008536741
1167	SMA	0	8/24/15	21	0.222702558	0.223353829	1.336215348	0.00914129
1168	SMA	0	8/24/15	22	0.247733447	0.248382052	1.486400683	0.009973416
1169	SMA	0	8/24/15	23	0.263329911	0.261410505	1.579979464	0.013204044
1170	SMA	0	8/25/15	0	0.245854564	0.246251788	1.475127386	0.003870385
1171	SMA	0	8/25/15	1	0.234830506	0.234797439	1.408983035	0.006176001
1172	SMA	0	8/25/15	2	0.220944192	0.222163966	1.32566515	0.01065807
1173	SMA	0	8/25/15	3	0.227906554	0.22657051	1.367439325	0.0042509
1174	SMA	0	8/25/15	4	0.209144127	0.209515474	1.254864761	0.009133935
1175	SMA	0	8/25/15	5	0.267518927	0.26241502	1.60511356	0.061223705
1176	SMA	0	8/25/15	6	0.310484817	0.32128099	0.931454451	0.033979663
1177	SMA	0	8/25/15	20	0.264703872	0.263568088	0.794111617	0.011507569
1178	SMA	0	8/25/15	21	0.248449276	0.247787793	1.490695656	0.005377459
1179	SMA	0	8/25/15	22	0.218193663	0.219264654	1.309161978	0.005685805
1180	SMA	0	8/25/15	23	0.204979465	0.204850353	1.229876788	0.007671681
1181	SMA	0	8/26/15	0	0.19501455	0.194960654	1.170087301	0.005350682
1182	SMA	0	8/26/15	1	0.195031471	0.195131386	1.170188825	0.005940175
1183	SMA	0	8/26/15	2	0.226927561	0.22643869	1.361565364	0.006006148
1184	SMA	0	8/26/15	3	0.177561745	0.178065295	1.065370471	0.007854748
1185	SMA	0	8/26/15	4	0.175819833	0.17520914	1.054918996	0.009567699
1186	SMA	0	8/26/15	5	0.242887862	0.238352492	1.457327175	0.064241395
1187	SMA	0	8/26/15	6	0.311238089	0.309871866	0.933714266	0.023359911
1188	SMA	0	8/26/15	20	0.271168013	0.269126185	0.813504038	0.008668452
1189	SMA	0	8/26/15	21	0.251396508	0.251218222	1.508379048	0.007872528
1190	SMA	0	8/26/15	22	0.234888493	0.235801468	1.409330959	0.007335157
1191	SMA	0	8/26/15	23	0.222763301	0.223626375	1.336579806	0.010515432
1192	SMA	0	8/27/15	0	0.220726798	0.221209347	1.324360789	0.006382145
1193	SMA	0	8/27/15	1	0.23175405	0.233903784	1.390524297	0.010028643
1194	SMA	0	8/27/15	2	0.220594114	0.220607702	1.323564683	0.021613208
1195	SMA	0	8/27/15	3	0.20248839	0.201691074	1.214930339	0.002076794
1196	SMA	0	8/27/15	4	0.218756341	0.220486915	1.312538045	0.004371812
1197	SMA	0	8/27/15	5	0.249203531	0.248270204	1.495221189	0.009877793
1198	SMA	0	8/27/15	6	0.271111704	0.278580035	0.813335111	0.020243009
1199	SMA	0	8/27/15	20	0.270539775	0.270316028	0.811619326	0.009217439
1200	SMA	0	8/27/15	21	0.237969726	0.236749194	1.427818359	0.017965426
1201	SMA	0	8/27/15	22	0.282788563	0.284917825	1.696731379	0.011995691
1202	SMA	0	8/27/15	23	0.265788961	0.266992674	1.594733766	0.017090831
1203	SMA	0	8/28/15	0	0.279538879	0.279714004	1.677233277	0.028343193
1204	SMA	0	8/28/15	1	0.257602158	0.256278817	1.545612949	0.01243443
1205	SMA	0	8/28/15	2	0.260739414	0.25842316	1.564436485	0.010167799
1206	SMA	0	8/28/15	3	0.308585264	0.308842064	1.851511585	0.00355098
1207	SMA	0	8/28/15	4	0.285947183	0.287375059	1.715683098	0.007470425
1208	SMA	0	8/28/15	5	0.295848781	0.296385761	1.775092685	0.003924148
1209	SMA	0	8/28/15	6	0.391146752	0.393223951	1.173440257	0.030436069
1210	SMA	0	8/28/15	20	0.242692247	0.24209835	0.728076742	0.01866364
1211	SMA	0	8/28/15	21	0.218683675	0.216969945	1.312102048	0.007402713
1212	SMA	0	8/28/15	22	0.211984357	0.212689864	1.27190614	0.008404962
1213	SMA	0	8/28/15	23	0.177980113	0.177684627	1.067880676	0.008534815
1214	SMA	0	8/29/15	0	0.213568041	0.21512848	1.281408244	0.018173375
1215	SMA	0	8/29/15	1	0.638932004	0.635742147	3.833592025	0.109689342
1216	SMA	0	8/29/15	2	0.375736616	0.379501483	2.254419694	0.250165453
1217	SMA	0	8/29/15	3	0.137502377	0.13662098	0.82501426	0.015652916
1218	SMA	0	8/29/15	4	0.126781621	0.125822024	0.760689724	0.012255146
1219	SMA	0	8/29/15	5	0.127768438	0.127145214	0.766610628	0.011294831
1220	SMA	0	8/29/15	6	0.153168074	0.150623588	0.459504222	0.025404266
1221	SMA	0	8/29/15	20	0.267209032	0.266498421	0.801627095	0.00592605
1222	SMA	0	8/29/15	21	0.260297072	0.258141319	1.561782434	0.019861589
1223	SMA	0	8/29/15	22	0.252822045	0.250977833	1.51693227	0.010541275
1224	SMA	0	8/29/15	23	0.248435931	0.250239091	1.490615585	0.006928829
1225	SMA	0	8/30/15	0	0.242277453	0.241072179	1.453664721	0.003568312
1226	SMA	0	8/30/15	1	0.239119987	0.239263309	1.434719924	0.006893002
1227	SMA	0	8/30/15	2	0.230481573	0.231727923	1.382889441	0.006281483
1228	SMA	0	8/30/15	3	0.232031	0.231693569	1.392186003	0.00319661
1229	SMA	0	8/30/15	4	0.244692887	0.24377583	1.468157321	0.012758137
1230	SMA	0	8/30/15	5	0.323832336	0.327978935	1.942994016	0.066866929
1231	SMA	0	8/30/15	6	0.199386686	0.199382606	0.598160059	0.014791443
1232	SMA	0	8/30/15	20	0.416986901	0.414848231	1.250960704	0.004627847
1233	SMA	0	8/30/15	21	0.410921351	0.415709302	2.465528107	0.009929672
1234	SMA	0	8/30/15	22	0.433029494	0.433014105	2.598176965	0.011431893
1235	SMA	0	8/30/15	23	0.411546803	0.412434384	2.469280817	0.039271197
1236	SMA	0	8/31/15	0	0.419815164	0.41969277	2.518890985	0.003479012
1237	SMA	0	8/31/15	1	0.385895115	0.385505454	2.315370692	0.017054665
1238	SMA	0	8/31/15	2	0.352030431	0.351670059	2.112182585	0.002017804
1239	SMA	0	8/31/15	3	0.377283637	0.376182567	2.26370182	0.002971119
1240	SMA	0	8/31/15	4	0.350689204	0.351180152	2.104135225	0.010851834
1241	SMA	0	8/31/15	5	0.340487215	0.340793087	2.042923289	0.004820982
1242	SMA	0	8/31/15	6	0.339409937	0.339393926	1.018229811	0.007427176
1243	SMA	0	8/31/15	20	0.430783118	0.434986174	1.292349353	0.016523067
1244	SMA	0	8/31/15	21	0.383942249	0.385714833	2.303653496	0.025927745
1245	SMA	0	8/31/15	22	0.27487806	0.274433057	1.649268362	0.011720766
1246	SMA	0	8/31/15	23	0.305165763	0.305306769	1.830994577	0.016672101
1247	SMA	0	9/1/15	0	0.277756799	0.2780696	1.666540794	0.009764034
1248	SMA	0	9/1/15	1	0.324886937	0.324559393	1.949321623	0.005408596
1249	SMA	0	9/1/15	2	0.320830573	0.320285286	1.924983439	0.008003522
1250	SMA	0	9/1/15	3	0.320622232	0.322163455	1.923733393	0.020142677
1251	SMA	0	9/1/15	4	0.294741396	0.295062879	1.768448377	0.007050796
1252	SMA	0	9/1/15	5	0.305914229	0.30740875	1.835485376	0.005311542
1253	SMA	0	9/1/15	6	0.347854104	0.347833344	1.043562312	0.006077094
1254	SMA	0	9/1/15	20	0.314831836	0.314441453	0.944495509	0.005424074
1255	SMA	0	9/1/15	21	0.286322218	0.287944139	1.717933306	0.014495992
1256	SMA	0	9/1/15	22	0.268239463	0.267629305	1.609436776	0.008849227
1257	SMA	0	9/1/15	23	0.263966098	0.264401923	1.58379659	0.009451124
1258	SMA	0	9/2/15	0	0.292472665	0.291445649	0.877417994	0.009364197
1259	SMA	0	9/2/15	1	0.295313788	0.295426313	1.771882729	0.01107696
1260	SMA	0	9/2/15	2	0.31235094	0.31142317	1.874105642	0.007248648
1261	SMA	0	9/2/15	3	0.300792118	0.300661445	1.80475271	0.00281129
1262	SMA	0	9/2/15	4	0.289552052	0.290623901	1.73731231	0.043789574
1263	SMA	0	9/2/15	5	0.294350048	0.291216651	1.766100288	0.010003589
1264	SMA	0	9/2/15	6	0.235499824	0.23495803	0.706499471	0.00770223
1265	SMA	0	9/2/15	20	0.405419203	0.406551229	1.21625761	0.006848929
1266	SMA	0	9/2/15	21	0.336357114	0.337093263	2.018142687	0.003770514
1267	SMA	0	9/2/15	22	0.321212382	0.318629716	1.927274294	0.014453155
1268	SMA	0	9/2/15	23	0.328680859	0.327414198	1.972085153	0.003014955
1269	SMA	0	9/3/15	0	0.347139225	0.346561354	2.082835353	0.011420358
1270	SMA	0	9/3/15	1	0.341630933	0.338074354	2.049785597	0.013835478
1271	SMA	0	9/3/15	2	0.334426346	0.334358851	2.006558079	0.00787953
1272	SMA	0	9/3/15	3	0.338824146	0.338701448	2.032944877	0.01964765
1273	SMA	0	9/3/15	4	0.355892266	0.35577613	2.135353594	0.016269711
1274	SMA	0	9/3/15	5	0.364606756	0.363660167	2.187640537	0.017648892
1275	SMA	0	9/3/15	6	0.367781283	0.372310113	1.10334385	0.008476877
1276	SMA	0	9/3/15	20	0.583548492	0.585413231	1.750645477	0.003880991
1277	SMA	0	9/3/15	21	0.338340383	0.336388464	2.030042299	0.037543266
1278	SMA	0	9/3/15	22	0.326916885	0.325592018	1.961501307	0.005405428
1279	SMA	0	9/3/15	23	0.283568271	0.28434365	1.701409628	0.007264262
1280	SMA	0	9/4/15	0	0.266847972	0.265960072	1.601087831	0.004925684
1281	SMA	0	9/4/15	1	0.245496862	0.24620175	1.472981172	0.005816893
1282	SMA	0	9/4/15	2	0.221169712	0.22153583	1.327018273	0.007469497
1283	SMA	0	9/4/15	3	0.242075278	0.242365964	1.452451669	0.012050866
1284	SMA	0	9/4/15	4	0.249338314	0.250599635	1.496029886	0.012002607
1285	SMA	0	9/4/15	5	0.271354038	0.271713813	1.628124228	0.005079948
1286	SMA	0	9/4/15	6	0.287692171	0.289491144	0.863076514	0.007143127
1287	SMA	0	9/4/15	20	0.309903205	0.308426572	0.929709615	0.002702658
1288	SMA	0	9/4/15	21	0.257010814	0.257406377	1.542064883	0.002936685
1289	SMA	0	9/4/15	22	0.255795191	0.255379573	1.534771147	0.018632492
1290	SMA	0	9/4/15	23	0.228481586	0.228540921	1.370889519	0.014691752
1291	SMA	0	9/5/15	0	0.219538902	0.219447935	1.317233409	0.008452719
1292	SMA	0	9/5/15	1	0.2236731	0.223185911	1.342038599	0.011210201
1293	SMA	0	9/5/15	2	0.218662646	0.218496433	1.311975875	0.005593773
1294	SMA	0	9/5/15	3	0.2276198	0.228443442	1.3657188	0.007740301
1295	SMA	0	9/5/15	4	0.245075558	0.244324982	1.470453347	0.005618067
1296	SMA	0	9/5/15	5	0.272936481	0.27403995	1.637618888	0.016790428
1297	SMA	0	9/5/15	6	0.256277668	0.254726777	1.53766601	0.020827227
1298	SMA	0	9/5/15	20	0.358514558	0.356875424	1.075543674	0.006238828
1299	SMA	0	9/5/15	21	0.349470622	0.348602534	2.09682373	0.004238874
1300	SMA	0	9/5/15	22	0.294521233	0.294947703	1.7671274	0.006436684
1301	SMA	0	9/5/15	23	0.275639672	0.275231134	1.653838033	0.002814212
1302	SMA	0	9/6/15	0	0.253980559	0.254790067	1.523883354	0.003367831
1303	SMA	0	9/6/15	1	0.227361126	0.227651593	1.364166755	0.007102807
1304	SMA	0	9/6/15	2	0.212074009	0.212449037	1.272444053	0.002388073
1305	SMA	0	9/6/15	3	0.222586495	0.222831889	1.335518969	0.006611363
1306	SMA	0	9/6/15	4	0.207068779	0.206605907	1.242412674	0.002087263
1307	SMA	0	9/6/15	5	0.226817795	0.22730169	1.360906772	0.010780172
1308	SMA	0	9/6/15	6	0.236440424	0.236608748	1.418642546	0.002414192
1309	SMA	0	9/6/15	20	0.417351303	0.415984441	1.25205391	0.006017529
1310	SMA	0	9/6/15	21	0.398431746	0.399085557	2.390590476	0.0233874
1311	SMA	0	9/6/15	22	0.361046934	0.361923041	2.166281606	0.018816241
1312	SMA	0	9/6/15	23	0.319645629	0.319468337	1.917873775	0.017666038
1313	SMA	0	9/7/15	0	0.304383099	0.305176531	1.826298596	0.009909612
1314	SMA	0	9/7/15	1	0.273918473	0.275019789	1.643510837	0.014681226
1315	SMA	0	9/7/15	2	0.238359231	0.239260697	1.430155389	0.007858138
1316	SMA	0	9/7/15	3	0.254208666	0.254269823	1.525251997	0.024360724
1317	SMA	0	9/7/15	4	0.22956012	0.231010509	1.377360723	0.01081306
1318	SMA	0	9/7/15	5	0.253229483	0.25653879	1.519376897	0.008145231
1319	SMA	0	9/7/15	6	0.226417411	0.226824034	1.358504467	0.009833945
1320	SMA	0	9/7/15	20	0.559841982	0.558978987	1.679525947	0.004017868
1321	SMA	0	9/7/15	21	0.443325588	0.444176372	2.659953526	0.031676515
1322	SMA	0	9/7/15	22	0.293747889	0.29407189	1.762487335	0.015882524
1323	SMA	0	9/7/15	23	0.262924836	0.262802423	1.577549018	0.006215724
1324	SMA	0	9/8/15	0	0.23058878	0.229513042	1.383532679	0.008653224
1325	SMA	0	9/8/15	1	0.248597579	0.248939763	1.491585475	0.004460277
1326	SMA	0	9/8/15	2	0.259051713	0.25877899	1.554310279	0.007161504
1327	SMA	0	9/8/15	3	0.24791252	0.248364228	1.48747512	0.006076878
1328	SMA	0	9/8/15	4	0.262578395	0.263644585	1.57547037	0.015498227
1329	SMA	0	9/8/15	5	0.292250111	0.290152323	1.753500669	0.009816483
1330	SMA	0	9/8/15	6	0.272225035	0.273474331	1.633350208	0.005283852
1331	SMA	0	9/8/15	20	0.264383584	0.266193248	0.793150752	0.00471065
1332	SMA	0	9/8/15	21	0.259857603	0.261218937	1.55914562	0.018473344
1333	SMA	0	9/8/15	22	0.248535253	0.248098211	1.491211521	0.016550429
1334	SMA	0	9/8/15	23	0.229724966	0.229604788	1.378349796	0.004933445
1335	SMA	0	9/9/15	0	0.243532705	0.244559571	1.461196228	0.008891921
1336	SMA	0	9/9/15	1	0.305376101	0.305007566	1.832256608	0.007161268
1337	SMA	0	9/9/15	2	0.329461642	0.329814943	1.976769854	0.004357569
1338	SMA	0	9/9/15	3	0.286265368	0.28757555	1.71759221	0.008784493
1339	SMA	0	9/9/15	4	0.259559829	0.258827629	1.557358973	0.006002778
1340	SMA	0	9/9/15	5	0.271379804	0.271585344	1.628278826	0.015156966
1341	SMA	0	9/9/15	6	0.292784752	0.290631097	1.756708511	0.017170699
1342	SMA	0	9/9/15	20	0.239301937	0.239304146	0.71790581	0.007511846
1343	SMA	0	9/9/15	21	0.250728027	0.245869091	1.504368159	0.024228242
1344	SMA	0	9/9/15	22	0.225866343	0.226659632	1.355198058	0.005136648
1345	SMA	0	9/9/15	23	0.222018071	0.221584996	1.332108425	0.002510574
1346	SMA	0	9/10/15	0	0.217437746	0.21905094	1.304626475	0.00819254
1347	SMA	0	9/10/15	1	0.212371106	0.213145429	1.274226637	0.010447011
1348	SMA	0	9/10/15	2	0.249273942	0.249479369	1.495643652	0.004291295
1349	SMA	0	9/10/15	3	0.269456953	0.269211233	1.616741715	0.019082943
1350	SMA	0	9/10/15	4	0.273249484	0.273806662	1.639496901	0.001880091
1351	SMA	0	9/10/15	5	0.266680091	0.268382168	1.600080543	0.006516436
1352	SMA	0	9/10/15	6	0.265394013	0.264483368	1.592364076	0.01058569
1353	SMA	0	9/10/15	20	0.268223103	0.2698202	0.804669309	0.00797582
1354	SMA	0	9/10/15	21	0.248927234	0.248561529	1.493563405	0.012080928
1355	SMA	0	9/10/15	22	0.256280866	0.255834284	1.537685194	0.019342721
1356	SMA	0	9/10/15	23	0.287169	0.287474048	1.723013997	0.01988972
1357	SMA	0	9/11/15	0	0.255782605	0.255901159	1.534695633	0.015296187
1358	SMA	0	9/11/15	1	0.263033622	0.264432111	1.578201729	0.011151378
1359	SMA	0	9/11/15	2	0.239723142	0.239371694	1.438338851	0.014346711
1360	SMA	0	9/11/15	3	0.222768391	0.221708578	1.336610346	0.006758502
1361	SMA	0	9/11/15	4	0.227138634	0.226844496	1.362831803	0.011435312
1362	SMA	0	9/11/15	5	0.20796494	0.207825373	1.24778964	0.0069458
1363	SMA	0	9/11/15	6	0.205492284	0.205404242	1.232953702	0.010317533
1364	SMA	0	9/11/15	20	0.221188263	0.223530913	0.663564789	0.007629533
1365	SMA	0	9/11/15	21	0.19371645	0.193860295	1.1622987	0.006580524
1366	SMA	0	9/11/15	22	0.197886819	0.197538807	1.187320917	0.005473854
1367	SMA	0	9/11/15	23	0.215820788	0.215144922	1.294924729	0.00580102
1368	SMA	0	9/12/15	0	0.220942861	0.219608953	1.325657169	0.005056034
1369	SMA	0	9/12/15	1	0.215515073	0.214534766	1.293090436	0.005841108
1370	SMA	0	9/12/15	2	0.200239087	0.201007913	1.20143452	0.008549748
1371	SMA	0	9/12/15	3	0.181353357	0.182481576	1.088120142	0.008487612
1372	SMA	0	9/12/15	4	0.185222909	0.185111014	1.111337454	0.002437665
1373	SMA	0	9/12/15	5	0.188963624	0.188971166	1.133781746	0.003190243
1374	SMA	0	9/12/15	6	0.183834549	0.184416615	1.103007293	0.004315976
1375	SMA	0	9/12/15	20	0.219019335	0.21846206	0.657058004	0.008551721
1376	SMA	0	9/12/15	21	0.216987346	0.216657113	1.301924073	0.007781583
1377	SMA	0	9/12/15	22	0.231793697	0.233262686	1.390762184	0.013794649
1378	SMA	0	9/12/15	23	0.244794002	0.245074729	1.46876401	0.014310237
1379	SMA	0	9/13/15	0	0.253061643	0.252247091	1.518369861	0.005518228
1380	SMA	0	9/13/15	1	0.246473102	0.24513382	1.478838611	0.004971343
1381	SMA	0	9/13/15	2	0.24782301	0.248442796	1.486938059	0.013065186
1382	SMA	0	9/13/15	3	0.210584751	0.212350748	1.263508508	0.005996622
1383	SMA	0	9/13/15	4	0.179426872	0.180623484	1.076561235	0.012760015
1384	SMA	0	9/13/15	5	0.197334893	0.197175782	1.184009359	0.017439369
1385	SMA	0	9/13/15	6	0.20755537	0.207784229	1.24533222	0.009196785
1386	SMA	0	9/13/15	20	0.273721191	0.272392785	0.821163572	0.007188303
1387	SMA	0	9/13/15	21	0.260481763	0.260955482	1.562890579	0.009810621
1388	SMA	0	9/13/15	22	0.266864271	0.268877276	1.601185628	0.024077804
1389	SMA	0	9/13/15	23	0.284949573	0.286035385	1.70969744	0.010581197
1390	SMA	0	9/14/15	0	0.283638312	0.284992705	1.701829873	0.005397655
1391	SMA	0	9/14/15	1	0.272811326	0.272360006	1.636867955	0.008078545
1392	SMA	0	9/14/15	2	0.247045287	0.246344494	1.482271725	0.006372164
1393	SMA	0	9/14/15	3	0.252018331	0.251257896	1.512109987	0.015497078
1394	SMA	0	9/14/15	4	0.241498106	0.241099889	1.448988634	0.009245041
1395	SMA	0	9/14/15	5	0.225547023	0.226527659	1.353282139	0.006803042
1396	SMA	0	9/14/15	6	0.232788165	0.23311798	1.396728988	0.003631738
1397	SMA	0	9/14/15	19	0.200695798	0.201162688	0.602087394	0.003894913
1398	SMA	0	9/14/15	20	0.198169077	0.196621238	1.189014465	0.021782153
1399	SMA	0	9/14/15	21	0.193114146	0.191722285	1.158684877	0.003468677
1400	SMA	0	9/14/15	22	0.221993245	0.222174825	1.331959471	0.001024566
1401	SMA	0	9/14/15	23	0.222990145	0.223030448	1.337940871	0.017672293
1402	SMA	0	9/15/15	0	0.233513763	0.23443284	1.401082576	0.001641355
1403	SMA	0	9/15/15	1	0.220497114	0.220338388	1.322982681	0.009913812
1404	SMA	0	9/15/15	2	0.206516714	0.205913148	1.239100285	0.00789991
1405	SMA	0	9/15/15	3	0.202614136	0.203483674	1.215684818	0.010398351
1406	SMA	0	9/15/15	4	0.197722361	0.197331281	1.186334165	0.004123349
1407	SMA	0	9/15/15	5	0.209289131	0.207809174	1.255734787	0.005235257
1408	SMA	0	9/15/15	6	0.207322511	0.208214722	0.621967532	0.001912975
1409	SMA	0	9/15/15	19	0.160997336	0.161034466	0.482992008	0.002438303
1410	SMA	0	9/15/15	20	0.177081666	0.176699365	1.062489996	0.00574649
1411	SMA	0	9/15/15	21	0.16863105	0.168464186	1.011786301	0.003565948
1412	SMA	0	9/15/15	22	0.175738965	0.175803295	1.054433788	0.003876781
1413	SMA	0	9/15/15	23	0.180161006	0.180603272	1.080966037	0.003572778
1414	SMA	0	9/16/15	0	0.186927432	0.187466694	1.121564592	0.00351552
1415	SMA	0	9/16/15	1	0.185883604	0.185088838	1.115301622	0.006527723
1416	SMA	0	9/16/15	2	0.176984811	0.176806042	1.061908863	0.003437958
1417	SMA	0	9/16/15	3	0.181868704	0.181520387	1.091212226	0.004336517
1418	SMA	0	9/16/15	4	0.179466128	0.180375726	1.076796768	0.0077794
1419	SMA	0	9/16/15	5	0.198158745	0.197706841	1.18895247	0.004427627
1420	SMA	0	9/16/15	6	0.201000304	0.202100693	0.603000912	0.003165523
1421	SMA	0	9/16/15	19	0.202164955	0.203092882	0.606494865	0.002442568
1422	SMA	0	9/16/15	20	0.218888976	0.218543137	1.313333854	0.004903201
1423	SMA	0	9/16/15	21	0.213458636	0.212127796	1.280751816	0.007151689
1424	SMA	0	9/16/15	22	0.220196596	0.220123495	1.321179575	0.007264126
1425	SMA	0	9/16/15	23	0.326679506	0.327133276	1.960077036	0.062410653
1426	SMA	0	9/17/15	0	0.238584353	0.239673082	1.43150612	0.022129642
1427	SMA	0	9/17/15	1	0.242146449	0.241816716	1.452878691	0.005601278
1428	SMA	0	9/17/15	2	0.249423185	0.249986177	1.49653911	0.008130358
1429	SMA	0	9/17/15	3	0.286624132	0.286497593	1.719744793	0.004823664
1430	SMA	0	9/17/15	4	0.272656794	0.273983954	1.635940762	0.00796851
1431	SMA	0	9/17/15	5	0.276120932	0.275662529	1.65672559	0.009267087
1432	SMA	0	9/17/15	6	0.303476927	0.304424036	0.910430782	0.007160792
1433	SMA	0	9/17/15	19	0.322655626	0.321200504	0.967966878	0.00394972
1434	SMA	0	9/17/15	20	0.309547532	0.310502793	1.857285194	0.007456496
1435	SMA	0	9/17/15	21	0.350703738	0.35108267	2.104222427	0.006605069
1436	SMA	0	9/17/15	22	0.313490152	0.314195311	1.880940911	0.027312583
1437	SMA	0	9/17/15	23	0.31341136	0.31370659	1.880468159	0.005253446
1438	SMA	0	9/18/15	0	0.313140402	0.31356061	1.878842411	0.006137679
1439	SMA	0	9/18/15	1	0.308392626	0.309177966	1.850355756	0.013183468
1440	SMA	0	9/18/15	2	0.287240119	0.287387431	1.723440717	0.002097736
1441	SMA	0	9/18/15	3	0.319759152	0.321654542	1.918554913	0.008853322
1442	SMA	0	9/18/15	4	0.297326304	0.296605408	1.783957824	0.002840371
1443	SMA	0	9/18/15	5	0.272725191	0.272435784	1.636351147	0.006761111
1444	SMA	0	9/18/15	6	0.291114621	0.290763783	0.873343862	0.000667441
1445	SMA	0	9/18/15	19	0.217869403	0.217841687	0.65360821	0.000377405
1446	SMA	0	9/18/15	20	0.201190466	0.201206792	1.207142799	0.011891435
1447	SMA	0	9/18/15	21	0.181562957	0.183002541	1.089377744	0.005150627
1448	SMA	0	9/18/15	22	0.186070046	0.185126097	1.116420277	0.002249586
1449	SMA	0	9/18/15	23	0.192920473	0.192821401	1.157522836	0.006117802
1450	SMA	0	9/19/15	0	0.197861172	0.19893498	1.187167034	0.01732958
1451	SMA	0	9/19/15	1	0.196708126	0.197185678	1.180248758	0.010770812
1452	SMA	0	9/19/15	2	0.189611376	0.190336515	1.137668256	0.00712344
1453	SMA	0	9/19/15	3	0.192062232	0.191059886	1.15237339	0.002445648
1454	SMA	0	9/19/15	4	0.192808368	0.191354192	1.156850211	0.002665368
1455	SMA	0	9/19/15	5	0.188250461	0.188055751	1.129502767	0.004730829
1456	SMA	0	9/19/15	6	0.202165559	0.202926278	0.606496678	0.005953878
1457	SMA	0	9/19/15	19	0.436017722	0.435634484	1.308053167	0.000993261
1458	SMA	0	9/19/15	20	0.289366792	0.291848032	1.736200749	0.083612424
1459	SMA	0	9/19/15	21	0.192157128	0.192014075	1.152942766	0.005945807
1460	SMA	0	9/19/15	22	0.183232954	0.182560322	1.099397726	0.00459694
1461	SMA	0	9/19/15	23	0.166165873	0.16707186	0.996995241	0.011997747
1462	SMA	0	9/20/15	0	0.162326673	0.161621754	0.97396004	0.003120447
1463	SMA	0	9/20/15	1	0.175387425	0.176462616	1.052324553	0.005096012
1464	SMA	0	9/20/15	2	0.173444429	0.173245872	1.040666574	0.005486631
1465	SMA	0	9/20/15	3	0.185097116	0.18543686	1.110582698	0.003055452
1466	SMA	0	9/20/15	4	0.19038331	0.190196439	1.142299858	0.003405353
1467	SMA	0	9/20/15	5	0.214507217	0.214156839	1.287043302	0.009480001
1468	SMA	0	9/20/15	6	0.206692536	0.206865772	0.620077607	0.001366899
1469	SMA	0	9/20/15	19	0.20248263	0.202017776	0.607447891	0.002945356
1470	SMA	0	9/20/15	20	0.188470068	0.189031016	1.130820409	0.010121924
1471	SMA	0	9/20/15	21	0.167922829	0.167840242	1.007536974	0.009973858
1472	SMA	0	9/20/15	22	0.160205254	0.160313928	0.961231525	0.006892727
1473	SMA	0	9/20/15	23	0.169343357	0.168888399	1.016060144	0.004846175
1474	SMA	0	9/21/15	0	0.177852713	0.176963028	1.06711628	0.005175303
1475	SMA	0	9/21/15	1	0.177838503	0.17730352	1.067031017	0.005642498
1476	SMA	0	9/21/15	2	0.176638474	0.176739275	1.059830843	0.007597582
1477	SMA	0	9/21/15	3	0.181832486	0.181154532	1.090994915	0.005940465
1478	SMA	0	9/21/15	4	0.178416515	0.178287283	1.07049909	0.009510922
1479	SMA	0	9/21/15	5	0.186926973	0.187543739	1.121561835	0.005097455
1480	SMA	0	9/21/15	6	0.189025425	0.18793931	0.567076274	0.004539388
1481	SMA	0	9/21/15	19	0.272940505	0.27092484	0.818821516	0.010202344
1482	SMA	0	9/21/15	20	0.23694239	0.236661274	1.421654339	0.015469405
1483	SMA	0	9/21/15	21	0.204508292	0.204625567	1.227049754	0.006376821
1484	SMA	0	9/21/15	22	0.204250885	0.20409743	1.225505309	0.006068983
1485	SMA	0	9/21/15	23	0.20420655	0.204661259	1.225239299	0.00774646
1486	SMA	0	9/22/15	0	0.199696283	0.199783167	1.198177696	0.007359316
1487	SMA	0	9/22/15	1	0.199188913	0.198977002	1.195133479	0.007114755
1488	SMA	0	9/22/15	2	0.202379154	0.201988851	1.214274921	0.005915817
1489	SMA	0	9/22/15	3	0.210580293	0.21004868	1.263481757	0.005884202
1490	SMA	0	9/22/15	4	0.233192991	0.233125412	1.399157944	0.008148803
1491	SMA	0	9/22/15	5	0.243625207	0.24363173	1.46175124	0.006359314
1492	SMA	0	9/22/15	6	0.24431073	0.243889609	0.732932191	0.005607909
1493	SMA	0	9/22/15	19	0.224291518	0.224034016	0.672874553	0.008026475
1494	SMA	0	9/22/15	20	0.184787205	0.184308625	1.108723231	0.012823816
1495	SMA	0	9/22/15	21	0.174738083	0.175174269	1.0484285	0.005473658
1496	SMA	0	9/22/15	22	0.178875868	0.178774509	1.073255209	0.004956584
1497	SMA	0	9/22/15	23	0.17151137	0.170608152	1.029068222	0.007880778
1498	SMA	0	9/23/15	0	0.189367089	0.188797807	1.136202537	0.006905842
1499	SMA	0	9/23/15	1	0.182892162	0.183586291	1.097352974	0.003522521
1500	SMA	0	9/23/15	2	0.172187894	0.172306654	1.033127366	0.005169737
1501	SMA	0	9/23/15	3	0.156898133	0.157199153	0.941388797	0.006957653
1502	SMA	0	9/23/15	4	0.17023388	0.171038632	1.021403281	0.005921759
1503	SMA	0	9/23/15	5	0.175363675	0.175852587	1.052182053	0.00586325
1504	SMA	0	9/23/15	6	0.170918905	0.170848512	0.512756716	0.00465728
1505	SMA	0	9/23/15	19	0.289716663	0.290012847	0.86914999	0.006752022
1506	SMA	0	9/23/15	20	0.293096419	0.292661893	1.758578513	0.01071709
1507	SMA	0	9/23/15	21	0.29907132	0.299212103	1.79442792	0.005608178
1508	SMA	0	9/23/15	22	0.30632288	0.304914202	1.837937278	0.005146593
1509	SMA	0	9/23/15	23	0.270722717	0.271327744	1.624336303	0.032359784
1510	SMA	0	9/24/15	0	0.292069352	0.293074844	1.752416114	0.013786356
1511	SMA	0	9/24/15	1	0.26724774	0.26749269	1.603486442	0.022719015
1512	SMA	0	9/24/15	2	0.245398626	0.245152488	1.472391758	0.004414809
1513	SMA	0	9/24/15	3	0.222216221	0.222702929	1.333297327	0.005531685
1514	SMA	0	9/24/15	4	0.264430414	0.265320757	1.586582487	0.017991224
1515	SMA	0	9/24/15	5	0.264039215	0.265557262	1.584235289	0.012895971
1516	SMA	0	9/24/15	6	0.238306585	0.23835102	0.714919756	0.004086881
1517	SMA	0	9/24/15	19	0.31505699	0.313865787	0.94517097	0.002722841
1518	SMA	0	9/24/15	20	0.288054799	0.289570482	1.728328796	0.045411676
1519	SMA	0	9/24/15	21	0.211467314	0.210683218	1.268803881	0.005894162
1520	SMA	0	9/24/15	22	0.220004263	0.220319141	1.320025577	0.004575088
1521	SMA	0	9/24/15	23	0.202632137	0.203345692	1.215792821	0.009019118
1522	SMA	0	9/25/15	0	0.23362188	0.232211225	1.401731283	0.011121862
1523	SMA	0	9/25/15	1	0.243227129	0.243886835	1.459362772	0.009250036
1524	SMA	0	9/25/15	2	0.20727401	0.206057972	1.243644059	0.005886633
1525	SMA	0	9/25/15	3	0.222188888	0.222140966	1.333133329	0.00719732
1526	SMA	0	9/25/15	4	0.225200622	0.217207266	1.351203732	0.031599126
1527	SMA	0	9/25/15	5	0.23066567	0.229875639	1.383994021	0.017161926
1528	SMA	0	9/25/15	6	0.250688068	0.251142981	0.752064205	0.004058071
1529	SMA	0	9/25/15	19	0.26874289	0.267692555	0.806228671	0.006433116
1530	SMA	0	9/25/15	20	0.258694799	0.257198286	1.552168792	0.015412383
1531	SMA	0	9/25/15	21	0.249238178	0.247750738	1.49542907	0.012810307
1532	SMA	0	9/25/15	22	0.240110555	0.240714025	1.440663332	0.0086922
1533	SMA	0	9/25/15	23	0.244669207	0.245864568	1.468015243	0.012038338
1534	SMA	0	9/26/15	0	0.23410013	0.233484382	1.404600783	0.007149949
1535	SMA	0	9/26/15	1	0.238481434	0.240151215	1.430888603	0.006726936
1536	SMA	0	9/26/15	2	0.229855825	0.230796045	1.37913495	0.00860896
1537	SMA	0	9/26/15	3	0.223962905	0.223190568	1.34377743	0.004932891
1538	SMA	0	9/26/15	4	0.222922556	0.221949132	1.337535339	0.007194143
1539	SMA	0	9/26/15	5	0.237265917	0.23693617	1.423595501	0.009008321
1540	SMA	0	9/26/15	6	0.224023014	0.223709646	0.672069042	0.007211919
1541	SMA	0	9/26/15	19	0.479240453	0.47878944	1.437721359	0.001325305
1542	SMA	0	9/26/15	20	0.487910696	0.487822815	2.927464174	0.000947259
1543	SMA	0	9/26/15	21	0.403599613	0.40438718	2.421597676	0.025382845
1544	SMA	0	9/26/15	22	0.340519722	0.341783299	2.043118333	0.022877627
1545	SMA	0	9/26/15	23	0.320188348	0.32122016	1.92113009	0.008960795
1546	SMA	0	9/27/15	0	0.335137022	0.335716294	2.010822132	0.007719181
1547	SMA	0	9/27/15	1	0.332545452	0.333510765	1.995272713	0.006248168
1548	SMA	0	9/27/15	2	0.306359618	0.307506659	1.838157709	0.005451266
1549	SMA	0	9/27/15	3	0.290482953	0.290817646	1.74289772	0.014224641
1550	SMA	0	9/27/15	4	0.267771872	0.268613915	1.606631235	0.005662798
1551	SMA	0	9/27/15	5	0.269660009	0.268796713	1.617960053	0.002676519
1552	SMA	0	9/27/15	6	0.280795943	0.281423221	1.68477566	0.009861686
1553	SMA	0	9/27/15	19	0.216078646	0.215051881	0.648235938	0.003145075
1554	SMA	0	9/27/15	20	0.198174972	0.197675539	1.189049833	0.004983528
1555	SMA	0	9/27/15	21	0.199422013	0.200047181	1.19653208	0.011907805
1556	SMA	0	9/27/15	22	0.241880505	0.243481149	1.451283032	0.019192684
1557	SMA	0	9/27/15	23	0.288456163	0.288995302	1.730736976	0.005102037
1558	SMA	0	9/28/15	0	0.285666007	0.286105369	1.713996045	0.005766141
1559	SMA	0	9/28/15	1	0.299220567	0.300525366	1.795323402	0.005966041
1560	SMA	0	9/28/15	2	0.261497446	0.262319217	1.568984677	0.007696561
1561	SMA	0	9/28/15	3	0.270014425	0.270845149	1.62008655	0.0041127
1562	SMA	0	9/28/15	4	0.23102635	0.231134955	1.386158098	0.014676998
1563	SMA	0	9/28/15	5	0.22835119	0.228771239	1.370107138	0.00289382
1564	SMA	0	9/28/15	6	0.222338831	0.222797242	1.334032988	0.00233567
1565	SMA	0	9/28/15	19	0.192748855	0.193129032	0.578246564	0.006757315
1566	SMA	0	9/28/15	20	0.1828628	0.183112971	1.097176802	0.004772421
1567	SMA	0	9/28/15	21	0.171859864	0.171990937	1.031159184	0.004173888
1568	SMA	0	9/28/15	22	0.177521865	0.177523442	1.065131191	0.005424071
1569	SMA	0	9/28/15	23	0.189890108	0.189645973	1.13934065	0.011616079
1570	SMA	0	9/29/15	0	0.200491977	0.200934726	1.202951861	0.011610259
1571	SMA	0	9/29/15	1	0.202219718	0.202365182	1.213318309	0.005809917
1572	SMA	0	9/29/15	2	0.165197684	0.164821323	0.991186104	0.013228306
1573	SMA	0	9/29/15	3	0.162898611	0.162466132	0.977391664	0.009223265
1574	SMA	0	9/29/15	4	0.164558813	0.164171118	0.987352877	0.007203224
1575	SMA	0	9/29/15	5	0.161242052	0.16196705	0.967452315	0.004340725
1576	SMA	0	9/29/15	6	0.154542948	0.154145459	0.927257687	0.005629011
1577	SMA	0	9/29/15	19	0.149381986	0.153377797	0.448145958	0.008644134
1578	SMA	0	9/29/15	20	0.164947884	0.167362169	0.989687303	0.009927042
1579	SMA	0	9/29/15	21	0.182393019	0.185222859	1.094358116	0.006115826
1580	SMA	0	9/29/15	22	0.194785053	0.19670307	1.168710319	0.008227817
1581	SMA	0	9/29/15	23	0.186035093	0.184977748	1.116210559	0.00735843
1582	SMA	0	9/30/15	0	0.198638804	0.201203383	1.191832826	0.007109572
1583	SMA	0	9/30/15	1	0.179726822	0.179957783	1.078360934	0.011362969
1584	SMA	0	9/30/15	2	0.185572795	0.184225665	1.113436768	0.008752481
1585	SMA	0	9/30/15	3	0.174826916	0.174305221	1.048961493	0.0100148
1586	SMA	0	9/30/15	4	0.176946065	0.17842572	1.061676388	0.005508434
1587	SMA	0	9/30/15	5	0.191483942	0.19229182	1.148903651	0.005693997
1588	SMA	0	9/30/15	6	0.180687262	0.182129685	1.084123569	0.005954609
1589	SMA	0	9/30/15	19	0.153619753	0.153282334	0.460859258	0.002701004
1590	SMA	0	9/30/15	20	0.137262306	0.138115848	0.823573837	0.008114527
1591	SMA	0	9/30/15	21	0.14895326	0.147516159	0.893719561	0.00480093
1592	SMA	0	9/30/15	22	0.163462115	0.165289418	0.980772691	0.004987675
1593	SMA	0	9/30/15	23	0.168986007	0.169283581	1.013916041	0.00607734
1594	SMA	0	10/1/15	0	0.182068022	0.182305709	1.09240813	0.001560037
1595	SMA	0	10/1/15	1	0.188180189	0.18792703	1.129081135	0.001310182
1596	SMA	0	10/1/15	2	0.191167134	0.191372722	1.147002807	0.006827682
1597	SMA	0	10/1/15	3	0.169189752	0.169457021	1.015138511	0.01011949
1598	SMA	0	10/1/15	4	0.16304734	0.162635458	0.97828404	0.003599539
1599	SMA	0	10/1/15	5	0.162348349	0.161945451	0.974090096	0.002245116
1600	SMA	0	10/1/15	6	0.169168836	0.168652456	1.015013018	0.004258268
1601	SMA	0	10/1/15	19	0.232330241	0.231688871	0.696990723	0.001185765
1602	SMA	0	10/1/15	20	0.184067077	0.184048345	1.104402463	0.014616066
1603	SMA	0	10/1/15	21	0.179640232	0.179744405	1.077841389	0.005887602
1604	SMA	0	10/1/15	22	0.214359849	0.214389827	1.286159095	0.01404842
1605	SMA	0	10/1/15	23	0.203692335	0.202440711	1.22215401	0.008253249
1606	SMA	0	10/2/15	0	0.253548109	0.254010745	1.521288655	0.007218551
1607	SMA	0	10/2/15	1	0.257142227	0.257109019	1.542853364	0.004314889
1608	SMA	0	10/2/15	2	0.263017962	0.264639539	1.57810777	0.021074882
1609	SMA	0	10/2/15	3	0.293303028	0.293108174	1.759818167	0.002135756
1610	SMA	0	10/2/15	4	0.307792322	0.30765233	1.846753934	0.007586232
1611	SMA	0	10/2/15	5	0.27981742	0.280958746	1.678904518	0.010870805
1612	SMA	0	10/2/15	6	0.286220807	0.286036498	1.717324845	0.003523714
1613	SMA	0	10/2/15	19	0.648109231	0.648796559	1.944327693	0.002477928
1614	SMA	0	10/2/15	20	0.568833986	0.569115837	3.413003915	0.00516834
1615	SMA	0	10/2/15	21	0.548051144	0.550170763	3.288306861	0.005391567
1616	SMA	0	10/2/15	22	0.492297863	0.493807148	2.95378718	0.007107832
1617	SMA	0	10/2/15	23	0.529489359	0.528288907	3.176936152	0.025655999
1618	SMA	0	10/3/15	0	0.550447947	0.549343181	3.30268768	0.01447369
1619	SMA	0	10/3/15	1	0.520920032	0.521292288	3.12552019	0.027655094
1620	SMA	0	10/3/15	2	0.50048054	0.501259619	3.002883241	0.005564356
1621	SMA	0	10/3/15	3	0.479572191	0.480124582	2.877433148	0.026617802
1622	SMA	0	10/3/15	4	0.458790455	0.460096935	2.752742732	0.02184901
1623	SMA	0	10/3/15	5	0.444227695	0.444767781	2.66536617	0.004597199
1624	SMA	0	10/3/15	6	0.419926324	0.419450978	2.519557944	0.005731815
1625	SMA	0	10/3/15	19	0.406487934	0.405713399	1.219463802	0.003401963
1626	SMA	0	10/3/15	20	0.428277007	0.427894102	2.569662044	0.037168056
1627	SMA	0	10/3/15	21	0.552760659	0.552919684	3.316563956	0.009180078
1628	SMA	0	10/3/15	22	0.42372328	0.424591209	2.542339678	0.047976442
1629	SMA	0	10/3/15	23	0.420148705	0.421246019	2.520892227	0.026021368
1630	SMA	0	10/4/15	0	0.425219455	0.425788247	2.551316732	0.023108294
1631	SMA	0	10/4/15	1	0.339635122	0.340530672	2.037810731	0.008311869
1632	SMA	0	10/4/15	2	0.349225154	0.347388211	2.095350924	0.035722548
1633	SMA	0	10/4/15	3	0.375663643	0.374132586	2.253981861	0.01447785
1634	SMA	0	10/4/15	4	0.35066949	0.349371676	2.104016939	0.050719654
1635	SMA	0	10/4/15	5	0.347777587	0.346778647	2.086665523	0.028733264
1636	SMA	0	10/4/15	6	0.367154932	0.3659346	2.20292959	0.004935628
1637	SMA	0	10/4/15	19	0.292627043	0.291905782	0.87788113	0.0044011
1638	SMA	0	10/4/15	20	0.276518465	0.274711795	1.659110788	0.018416902
1639	SMA	0	10/4/15	21	0.235957655	0.236484138	1.415745933	0.018991279
1640	SMA	0	10/4/15	22	0.226596577	0.226914399	1.359579463	0.009289644
1641	SMA	0	10/4/15	23	0.213587438	0.214181061	1.281524625	0.038315831
1642	SMA	0	10/5/15	0	0.171937063	0.172205898	1.03162238	0.005612441
1643	SMA	0	10/5/15	1	0.159538255	0.159812876	0.957229529	0.004866455
1644	SMA	0	10/5/15	2	0.181516074	0.182391689	1.089096442	0.025694802
1645	SMA	0	10/5/15	3	0.186459964	0.186220724	1.118759783	0.020566307
1646	SMA	0	10/5/15	4	0.172402254	0.173651472	1.034413524	0.004903382
1647	SMA	0	10/5/15	5	0.189354967	0.189525977	1.1361298	0.0034016
1648	SMA	0	10/5/15	6	0.225797812	0.226071838	1.354786874	0.011102322
1649	SMA	0	10/5/15	19	0.141080717	0.141699004	0.423242152	0.003015921
1650	SMA	0	10/5/15	20	0.144551259	0.144364252	0.867307554	0.005897977
1651	SMA	0	10/5/15	21	0.145819864	0.144875203	0.874919182	0.005963031
1652	SMA	0	10/5/15	22	0.133452914	0.134002091	0.800717481	0.009497436
1653	SMA	0	10/5/15	23	0.156735755	0.156406496	0.940414528	0.006871143
1654	SMA	0	10/6/15	0	0.134203498	0.134409535	0.805220988	0.015713446
1655	SMA	0	10/6/15	1	0.137989956	0.138341571	0.827939738	0.007371113
1656	SMA	0	10/6/15	2	0.12597689	0.125898189	0.755861339	0.00993765
1657	SMA	0	10/6/15	3	0.130712866	0.130262624	0.784277194	0.009951351
1658	SMA	0	10/6/15	4	0.157981436	0.158874397	0.947888618	0.007660649
1659	SMA	0	10/6/15	5	0.163907607	0.163566174	0.98344564	0.005925688
1660	SMA	0	10/6/15	6	0.17897236	0.177990748	1.073834158	0.0079644
1661	SMB	0	4/7/14	21	0.020652033	0.020702326	0.061956098	0.000216753
1662	SMB	0	4/7/14	22	0.020984482	0.020985398	0.125906892	0.000312043
1663	SMB	0	4/7/14	23	0.021599368	0.021600003	0.129596208	0.000316037
1664	SMB	0	4/8/14	0	0.022263904	0.022215463	0.133583422	0.000301161
1665	SMB	0	4/8/14	1	0.022663714	0.022663504	0.135982284	0.000343626
1666	SMB	0	4/8/14	2	0.02314757	0.023130737	0.138885417	0.000315751
1667	SMB	0	4/8/14	3	0.023552093	0.023546183	0.141312559	0.000375839
1668	SMB	0	4/8/14	4	0.023791862	0.023786625	0.071375586	0.000344362
1669	SMB	0	4/8/14	21	0.53469689	0.536440363	1.604090671	0.016339276
1670	SMB	0	4/8/14	22	0.674900015	0.67606287	4.049400092	0.066944178
1671	SMB	0	4/8/14	23	0.756486782	0.755115461	4.53892069	0.02236944
1672	SMB	0	4/9/14	0	1.121256901	1.11243623	6.727541404	0.117703049
1673	SMB	0	4/9/14	1	1.412051147	1.400259902	8.47230688	0.053282409
1674	SMB	0	4/9/14	2	1.847791492	1.84112959	11.08674895	0.079547797
1675	SMB	0	4/9/14	3	2.514324507	2.514796547	15.08594704	0.062611737
1676	SMB	0	4/9/14	4	1.826439623	1.834153642	5.47931887	0.032732694
1677	SMB	0	4/9/14	21	0.428948437	0.429794142	1.28684531	0.017342024
1678	SMB	0	4/9/14	22	0.414611882	0.409693901	2.487671294	0.013734288
1679	SMB	0	4/9/14	23	0.538148239	0.539176482	3.228889435	0.020288838
1680	SMB	0	4/10/14	0	1.051112408	1.041369757	6.306674448	0.131413372
1681	SMB	0	4/10/14	1	1.518154102	1.500556499	9.108924611	0.23327702
1682	SMB	0	4/10/14	2	1.313442097	1.310410649	7.88065258	0.062869021
1683	SMB	0	4/10/14	3	2.059181735	2.059356587	12.35509041	0.326310904
1684	SMB	0	4/10/14	4	1.772093222	1.784048885	5.316279667	0.028075402
1685	SMB	0	4/10/14	21	0.414333445	0.418948226	1.243000335	0.014124943
1686	SMB	0	4/10/14	22	0.456900267	0.459241733	2.741401604	0.014979807
1687	SMB	0	4/10/14	23	0.591807817	0.590130567	3.5508469	0.013624031
1688	SMB	0	4/11/14	0	0.71225428	0.709733285	4.27352568	0.010915587
1689	SMB	0	4/11/14	1	0.920551773	0.92156712	5.523310639	0.068522151
1690	SMB	0	4/11/14	2	1.322564442	1.321256371	7.935386649	0.166871496
1691	SMB	0	4/11/14	3	1.880541836	1.863172956	11.28325102	0.0375281
1692	SMB	0	4/11/14	4	2.097089587	2.107422877	6.29126876	0.022512938
1693	SMB	0	4/11/14	21	0.558545446	0.561554912	1.675636338	0.01019532
1694	SMB	0	4/11/14	22	0.52162214	0.520130406	3.129732842	0.023979996
1695	SMB	0	4/11/14	23	0.542937377	0.543184132	3.257624264	0.033844321
1696	SMB	0	4/12/14	0	0.592662813	0.591409003	3.555976876	0.028818158
1697	SMB	0	4/12/14	1	0.707005552	0.708949515	4.242033312	0.024461142
1698	SMB	0	4/12/14	2	0.919153286	0.922513072	5.514919713	0.02659517
1699	SMB	0	4/12/14	3	1.254167563	1.259070846	7.525005379	0.014908021
1700	SMB	0	4/12/14	4	1.272609137	1.277179634	3.817827412	0.012316381
1701	SMB	0	4/12/14	21	0.554587051	0.55651192	1.663761154	0.03004054
1702	SMB	0	4/12/14	22	0.601465766	0.603577252	3.608794595	0.023906019
1703	SMB	0	4/12/14	23	0.565304088	0.556290812	3.391824527	0.082486885
1704	SMB	0	4/13/14	0	0.530887293	0.533872094	3.185323759	0.027157193
1705	SMB	0	4/13/14	1	0.591225177	0.575390932	3.547351065	0.067097441
1706	SMB	0	4/13/14	2	0.714830219	0.70815018	4.288981312	0.116344486
1707	SMB	0	4/13/14	3	0.588556849	0.592877744	3.531341093	0.028324086
1708	SMB	0	4/13/14	4	0.62730377	0.63216495	1.88191131	0.027188865
1709	SMB	0	4/13/14	22	0.49419452	0.495652704	1.48258356	0.012688223
1710	SMB	0	4/13/14	23	0.661233597	0.662852326	1.983700791	0.00427642
1711	SMB	0	4/14/14	0	1.05553333	1.058105032	3.166599991	0.011055085
1712	SMB	0	4/14/14	1	1.252326394	1.257575357	3.756979181	0.013549715
1713	SMB	0	4/14/14	2	1.431657116	1.427009006	4.294971349	0.011247369
1714	SMB	0	4/14/14	3	1.927672517	1.941270316	5.783017552	0.030623118
1715	SMB	0	4/14/14	4	1.87989881	1.892597685	5.639696431	0.034645671
1716	SMB	0	4/14/14	22	0.622487686	0.628722723	1.867463058	0.027044651
1717	SMB	0	4/14/14	23	0.673601273	0.670992512	4.041607639	0.16509959
1718	SMB	0	4/15/14	0	1.120927934	1.117852221	6.725567607	0.042871825
1719	SMB	0	4/15/14	1	1.102570979	1.102875568	6.615425876	0.128496722
1720	SMB	0	4/15/14	2	1.119329299	1.116709251	6.715975794	0.074363886
1721	SMB	0	4/15/14	3	0.900546258	0.895070898	5.403277549	0.055587611
1722	SMB	0	4/15/14	4	0.751090341	0.754949202	4.506542046	0.028545521
1723	SMB	0	4/15/14	22	0.714187525	0.715642571	2.142562574	0.023703376
1724	SMB	0	4/15/14	23	0.726358324	0.726892501	4.358149942	0.031129316
1725	SMB	0	4/16/14	0	0.821795638	0.825280322	4.930773827	0.028400764
1726	SMB	0	4/16/14	1	0.862271242	0.840012648	5.173627449	0.134931238
1727	SMB	0	4/16/14	2	0.905782225	0.90654321	5.43469335	0.0209949
1728	SMB	0	4/16/14	3	0.889075575	0.869652446	5.334453451	0.078220584
1729	SMB	0	4/16/14	4	0.612058623	0.610776371	3.672351735	0.042763036
1730	SMB	0	4/16/14	22	1.448989247	1.449148733	4.346967742	0.007920032
1731	SMB	0	4/16/14	23	1.653641826	1.653405991	9.921850955	0.041724341
1732	SMB	0	4/17/14	0	1.903827932	1.893537068	11.42296759	0.056325637
1733	SMB	0	4/17/14	1	1.872531052	1.86798838	11.23518631	0.077352785
1734	SMB	0	4/17/14	2	2.011629343	2.002660786	12.06977606	0.026920959
1735	SMB	0	4/17/14	3	1.903567729	1.902592468	11.42140638	0.093237969
1736	SMB	0	4/17/14	4	1.791648498	1.774519006	10.74989099	0.147864121
1737	SMB	0	4/17/14	22	1.990166851	1.994440548	5.970500552	0.014513529
1738	SMB	0	4/17/14	23	3.085766163	3.111349714	18.51459698	0.367382918
1739	SMB	0	4/18/14	0	3.800486258	3.777806966	22.80291755	0.240234485
1740	SMB	0	4/18/14	1	3.441891424	3.442977471	20.65134855	0.020641779
1741	SMB	0	4/18/14	2	2.888320845	2.887115322	17.32992507	0.082464908
1742	SMB	0	4/18/14	3	3.037477534	3.018427171	18.2248652	0.341936732
1743	SMB	0	4/18/14	4	2.399225923	2.395970451	14.39535554	0.347621768
1744	SMB	0	4/18/14	22	2.428960798	2.443498994	7.286882395	0.02536636
1745	SMB	0	4/18/14	23	3.013892612	3.037134545	18.08335567	0.181926158
1746	SMB	0	4/19/14	0	3.41023787	3.387596365	20.46142722	0.141942008
1747	SMB	0	4/19/14	1	3.199289733	3.198024043	19.1957384	0.019220827
1748	SMB	0	4/19/14	2	3.22892211	3.227421838	19.37353266	0.41232456
1749	SMB	0	4/19/14	3	2.51769334	2.520776303	15.10616004	0.054866554
1750	SMB	0	4/19/14	4	1.808501058	1.801905721	10.85100635	0.187787227
1751	SMB	0	4/19/14	22	2.132486057	2.136157998	6.397458171	0.009252206
1752	SMB	0	4/19/14	23	3.396194587	3.391596852	20.37716752	0.284228935
1753	SMB	0	4/20/14	0	4.164907799	4.164270956	24.9894468	0.03870784
1754	SMB	0	4/20/14	1	3.337976781	3.314304967	20.02786069	0.383370764
1755	SMB	0	4/20/14	2	3.423293034	3.383683845	20.53975821	0.23753211
1756	SMB	0	4/20/14	3	2.906275912	2.892351524	17.43765547	0.209605449
1757	SMB	0	4/20/14	4	1.889785623	1.8721326	11.33871374	0.218295756
1758	SMB	0	4/20/14	22	2.26216098	2.27293274	6.786482941	0.04292647
1759	SMB	0	4/20/14	23	2.608087824	2.604118324	15.64852694	0.382920492
1760	SMB	0	4/21/14	0	3.374555655	3.384924704	20.24733393	0.149688775
1761	SMB	0	4/21/14	1	3.400426887	3.389197728	20.40256132	0.206398792
1762	SMB	0	4/21/14	2	3.335659429	3.313080578	20.01395657	0.247690701
1763	SMB	0	4/21/14	3	2.614859628	2.612836045	15.68915777	0.053179716
1764	SMB	0	4/21/14	4	2.164196333	2.163076927	12.985178	0.339201601
1765	SMB	0	4/21/14	22	1.172564631	1.18168767	3.517693894	0.016686801
1766	SMB	0	4/21/14	23	1.479557352	1.477152425	8.877344114	0.223197644
1767	SMB	0	4/22/14	0	2.551236043	2.558139742	15.30741626	0.169141107
1768	SMB	0	4/22/14	1	2.819230097	2.811569361	16.91538058	0.228728786
1769	SMB	0	4/22/14	2	2.362683278	2.343649487	14.17609967	0.071278699
1770	SMB	0	4/22/14	3	2.349185897	2.337500424	14.09511538	0.097256423
1771	SMB	0	4/22/14	4	1.84158581	1.807436632	11.04951486	0.510977051
1772	SMB	0	4/22/14	22	1.178733271	1.181447741	3.536199813	0.005437189
1773	SMB	0	4/22/14	23	1.77048288	1.765340147	10.62289728	0.234903881
1774	SMB	0	4/23/14	0	2.025782908	2.020331658	12.15469745	0.141639802
1775	SMB	0	4/23/14	1	1.72374662	1.722923557	10.34247972	0.179026937
1776	SMB	0	4/23/14	2	2.045315431	2.049013486	12.27189258	0.047993065
1777	SMB	0	4/23/14	3	1.866528395	1.868272507	11.19917037	0.030400393
1778	SMB	0	4/23/14	4	1.261042307	1.263900041	7.566253843	0.051877731
1779	SMB	0	4/23/14	22	1.293264974	1.293946824	3.879794921	0.011213517
1780	SMB	0	4/23/14	23	1.448765704	1.453036016	8.692594226	0.101673447
1781	SMB	0	4/24/14	0	1.467057388	1.468108355	8.802344329	0.04216628
1782	SMB	0	4/24/14	1	1.689578613	1.692111345	10.13747168	0.03888519
1783	SMB	0	4/24/14	2	1.763503731	1.757437459	10.58102239	0.082155069
1784	SMB	0	4/24/14	3	1.176946347	1.154063185	7.061678085	0.296214525
1785	SMB	0	4/24/14	4	0.539888814	0.541983494	3.239332882	0.099470889
1786	SMB	0	4/24/14	22	2.782091899	2.782740196	8.346275697	0.004525328
1787	SMB	0	4/24/14	23	3.627900567	3.626829128	21.7674034	0.089102639
1788	SMB	0	4/25/14	0	3.737499211	3.748476593	22.42499527	0.113474145
1789	SMB	0	4/25/14	1	3.441772954	3.420313915	20.65063772	0.55846494
1790	SMB	0	4/25/14	2	2.849131525	2.840209476	17.09478915	0.167214795
1791	SMB	0	4/25/14	3	3.012374713	3.012042504	18.07424828	0.102304598
1792	SMB	0	4/25/14	4	1.862354615	1.86518305	11.17412769	0.240935455
1793	SMB	0	4/25/14	22	1.66829783	1.674591078	5.004893489	0.016895945
1794	SMB	0	4/25/14	23	2.170187445	2.164943769	13.02112467	0.239099549
1795	SMB	0	4/26/14	0	2.577783124	2.562427179	15.46669874	0.194135715
1796	SMB	0	4/26/14	1	2.768786471	2.761277251	16.61271882	0.381004982
1797	SMB	0	4/26/14	2	2.616129359	2.620552133	15.69677615	0.200335841
1798	SMB	0	4/26/14	3	2.72785944	2.724588434	16.36715664	0.078656588
1799	SMB	0	4/26/14	4	1.422310581	1.424374108	4.266931743	0.005510771
1800	SMB	0	4/26/14	22	0.483386051	0.483087279	1.450158154	0.011242619
1801	SMB	0	4/26/14	23	0.695357287	0.695155728	4.172143719	0.069841726
1802	SMB	0	4/27/14	0	0.686169432	0.687583677	4.117016592	0.011728131
1803	SMB	0	4/27/14	1	0.797949193	0.797060711	4.787695156	0.100690559
1804	SMB	0	4/27/14	2	0.931057612	0.925815214	5.586345674	0.014448076
1805	SMB	0	4/27/14	3	1.096374693	1.088270504	6.578248158	0.326594654
1806	SMB	0	4/27/14	4	0.50371174	0.50245888	1.51113522	0.010778441
1807	SMB	0	4/27/14	22	3.78394781	3.78817112	11.35184343	0.02648282
1808	SMB	0	4/27/14	23	4.110741497	4.099599818	24.66444898	0.141601073
1809	SMB	0	4/28/14	0	4.189795061	4.185121655	25.13877037	0.026150824
1810	SMB	0	4/28/14	1	4.198810412	4.203926009	25.19286247	0.126524006
1811	SMB	0	4/28/14	2	3.729291258	3.712161251	22.37574755	0.172664174
1812	SMB	0	4/28/14	3	3.392697163	3.36798431	20.35618298	0.315596005
1813	SMB	0	4/28/14	4	3.171234035	3.168691754	9.513702106	0.021897204
1814	SMB	0	4/28/14	22	2.714117535	2.722285062	8.142352605	0.017411538
1815	SMB	0	4/28/14	23	3.61395128	3.579618382	21.68370768	0.435113932
1816	SMB	0	4/29/14	0	3.978371111	3.986952056	23.87022666	0.100195795
1817	SMB	0	4/29/14	1	4.00920498	3.988254513	24.05522988	0.162429742
1818	SMB	0	4/29/14	2	3.932053526	3.927055091	23.59232116	0.034278931
1819	SMB	0	4/29/14	3	3.0662171	3.05401168	18.3973026	0.424311399
1820	SMB	0	4/29/14	4	1.720686548	1.725889475	5.162059643	0.023538995
1821	SMB	0	4/29/14	22	1.668056577	1.667836995	5.004169731	0.003850735
1822	SMB	0	4/29/14	23	2.301573746	2.302274702	13.80944247	0.108932793
1823	SMB	0	4/30/14	0	2.749705505	2.752350559	16.49823303	0.088930208
1824	SMB	0	4/30/14	1	2.931173325	2.932866157	17.58703995	0.013580298
1825	SMB	0	4/30/14	2	3.052288194	3.042728764	18.31372916	0.252942023
1826	SMB	0	4/30/14	3	2.292699243	2.28144914	13.75619546	0.252606152
1827	SMB	0	4/30/14	4	1.784686801	1.782168942	5.354060404	0.013246665
1828	SMB	0	4/30/14	22	2.276546398	2.280508381	6.829639194	0.031205504
1829	SMB	0	4/30/14	23	3.036699793	3.041553884	18.22019876	0.136506536
1830	SMB	0	5/1/14	0	3.146892914	3.158587949	18.88135749	0.030492719
1831	SMB	0	5/1/14	1	3.122512617	3.126554948	18.7350757	0.055377078
1832	SMB	0	5/1/14	2	2.988869663	2.988633199	17.93321798	0.068390816
1833	SMB	0	5/1/14	3	2.886052828	2.89019165	17.31631697	0.164781157
1834	SMB	0	5/1/14	4	1.764506846	1.764954107	5.293520539	0.008658213
1835	SMB	0	5/1/14	22	1.992505158	2.004307967	5.977515474	0.022372177
1836	SMB	0	5/1/14	23	2.184881256	2.188809125	13.10928754	0.047080513
1837	SMB	0	5/2/14	0	2.545133471	2.543438841	15.27080083	0.104446387
1838	SMB	0	5/2/14	1	2.563803768	2.563107374	15.38282261	0.040170336
1839	SMB	0	5/2/14	2	2.083417746	2.085048354	12.50050648	0.227343326
1840	SMB	0	5/2/14	3	1.957594301	1.94918301	11.74556581	0.104899959
1841	SMB	0	5/2/14	4	1.404889736	1.419864029	4.214669207	0.034105026
1842	SMB	0	5/2/14	22	2.053044182	2.056688457	6.159132547	0.022533925
1843	SMB	0	5/2/14	23	2.403583228	2.398258412	14.42149937	0.15189603
1844	SMB	0	5/3/14	0	2.442158667	2.436626278	14.652952	0.13200929
1845	SMB	0	5/3/14	1	2.434351675	2.431818016	14.60611005	0.280506744
1846	SMB	0	5/3/14	2	2.52610673	2.529371716	15.15664038	0.135853366
1847	SMB	0	5/3/14	3	2.103064428	2.09126287	12.61838657	0.072835304
1848	SMB	0	5/3/14	4	1.601153581	1.599428285	4.803460744	0.008894936
1849	SMB	0	5/3/14	22	1.051844081	1.050676875	3.155532242	0.010262943
1850	SMB	0	5/3/14	23	1.303331227	1.294742012	7.819987363	0.041094934
1851	SMB	0	5/4/14	0	1.324682887	1.322756738	7.948097321	0.086153479
1852	SMB	0	5/4/14	1	1.426075721	1.428445826	8.556454329	0.091730111
1853	SMB	0	5/4/14	2	1.315083929	1.316648554	7.890503575	0.104001572
1854	SMB	0	5/4/14	3	1.10533287	1.102990141	6.631997217	0.103998395
1855	SMB	0	5/4/14	22	1.513844149	1.514248213	4.541532447	0.0322522
1856	SMB	0	5/4/14	23	2.101448769	2.094339194	12.60869262	0.226835886
1857	SMB	0	5/5/14	0	2.54864106	2.548758203	15.29184636	0.092349051
1858	SMB	0	5/5/14	1	2.401031218	2.402595003	14.40618731	0.126513388
1859	SMB	0	5/5/14	2	2.323579773	2.326313263	13.94147864	0.168910014
1860	SMB	0	5/5/14	3	1.904323032	1.893072419	11.42593819	0.339351538
1861	SMB	0	5/5/14	22	1.3709819	1.373333974	4.112945701	0.013227033
1862	SMB	0	5/5/14	23	1.851731272	1.844664445	11.11038763	0.030436192
1863	SMB	0	5/6/14	0	2.556548137	2.555907016	15.33928882	0.112717894
1864	SMB	0	5/6/14	1	2.648272035	2.639603854	15.88963221	0.129662441
1865	SMB	0	5/6/14	2	2.639146906	2.635708739	15.83488144	0.185863461
1866	SMB	0	5/6/14	3	2.34463375	2.325459438	14.0678025	0.350651655
1867	SMB	0	5/6/14	22	0.84168221	0.843768734	2.525046629	0.011467765
1868	SMB	0	5/6/14	23	1.176043489	1.163454482	7.056260931	0.170340296
1869	SMB	0	5/7/14	0	1.530124298	1.521696577	9.180745785	0.083987955
1870	SMB	0	5/7/14	1	2.167694246	2.180124485	13.00616547	0.041604586
1871	SMB	0	5/7/14	2	2.128521868	2.123999198	12.77113121	0.279955494
1872	SMB	0	5/7/14	3	1.993389202	1.993535628	11.96033521	0.10778626
1873	SMB	0	5/7/14	22	1.005137231	1.006673107	3.015411693	0.003653669
1874	SMB	0	5/7/14	23	1.462832573	1.463537007	8.776995438	0.238721814
1875	SMB	0	5/8/14	0	1.620880143	1.628677841	9.725280859	0.022860902
1876	SMB	0	5/8/14	1	2.001632587	1.994210514	12.00979552	0.187346109
1877	SMB	0	5/8/14	2	2.228751432	2.211402765	13.37250859	0.177358117
1878	SMB	0	5/8/14	3	1.873327957	1.868527874	11.23996774	0.388434513
1879	SMB	0	5/8/14	22	1.202414613	1.207269755	3.607243839	0.009977692
1880	SMB	0	5/8/14	23	1.717979348	1.699255423	10.30787609	0.236663
1881	SMB	0	5/9/14	0	1.925823363	1.895502448	11.55494018	0.276417115
1882	SMB	0	5/9/14	1	2.635124516	2.601963675	15.81074709	0.255978446
1883	SMB	0	5/9/14	2	2.926545924	2.906442925	17.55927554	0.218281934
1884	SMB	0	5/9/14	3	2.782952766	2.774973342	16.69771659	0.332121395
1885	SMB	0	5/9/14	22	1.122107509	1.124360261	3.366322526	0.00573714
1886	SMB	0	5/9/14	23	1.359811195	1.357249356	8.158867172	0.10118807
1887	SMB	0	5/10/14	0	1.534050209	1.52484925	9.204301256	0.079837843
1888	SMB	0	5/10/14	1	1.710602672	1.706321248	10.26361603	0.111508329
1889	SMB	0	5/10/14	2	1.98057356	1.96236454	11.88344136	0.127712723
1890	SMB	0	5/10/14	3	1.486540621	1.471767112	8.919243726	0.33968207
1891	SMB	0	5/10/14	22	0.729200968	0.728845047	2.187602904	0.015759299
1892	SMB	0	5/10/14	23	0.908369896	0.908322375	5.450219378	0.036000289
1893	SMB	0	5/11/14	0	0.967887705	0.970508584	5.807326232	0.03282966
1894	SMB	0	5/11/14	1	1.004555815	1.001742072	6.027334887	0.014896061
1895	SMB	0	5/11/14	2	1.135463553	1.133300829	6.812781315	0.031427343
1896	SMB	0	5/11/14	3	1.106693268	1.098469994	6.640159605	0.043958479
1897	SMB	0	5/11/14	22	0.508793097	0.508503209	1.52637929	0.014724273
1898	SMB	0	5/11/14	23	0.61349053	0.603087578	3.680943179	0.067844635
1899	SMB	0	5/12/14	0	0.810954141	0.80580755	4.865724845	0.01270114
1900	SMB	0	5/12/14	1	0.807469011	0.800959113	4.844814064	0.078841453
1901	SMB	0	5/12/14	2	0.985018085	0.981038687	5.910108507	0.112225443
1902	SMB	0	5/12/14	3	1.092729326	1.095340501	6.556375955	0.029714081
1903	SMB	0	5/12/14	22	0.931033099	0.929411151	2.793099296	0.005444785
1904	SMB	0	5/12/14	23	1.200911944	1.196896896	7.205471662	0.055367107
1905	SMB	0	5/13/14	0	1.278314436	1.278192346	7.669886617	0.051530472
1906	SMB	0	5/13/14	1	1.40606839	1.410522419	8.436410339	0.074551123
1907	SMB	0	5/13/14	2	1.601434267	1.60423597	9.608605603	0.096974073
1908	SMB	0	5/13/14	3	1.613386263	1.61282316	9.680317577	0.09142614
1909	SMB	0	5/13/14	22	1.066037918	1.068952164	3.198113755	0.005075458
1910	SMB	0	5/13/14	23	1.336325791	1.342148869	8.017954745	0.086194211
1911	SMB	0	5/14/14	0	1.285452936	1.286993905	7.712717618	0.030683164
1912	SMB	0	5/14/14	1	1.30013473	1.294500537	7.80080838	0.025901347
1913	SMB	0	5/14/14	2	1.670133416	1.673129997	10.0208005	0.088928018
1914	SMB	0	5/14/14	3	1.572620214	1.555875504	9.435721283	0.195009518
1915	SMB	0	5/14/14	22	1.144513277	1.150327418	3.43353983	0.011813682
1916	SMB	0	5/14/14	23	1.532196034	1.52885312	9.193176203	0.038652786
1917	SMB	0	5/15/14	0	1.607580137	1.60515255	9.645480823	0.04549987
1918	SMB	0	5/15/14	1	1.943038141	1.94030902	11.65822885	0.013002766
1919	SMB	0	5/15/14	2	1.829114788	1.821871324	10.97468873	0.123566078
1920	SMB	0	5/15/14	3	1.591755788	1.61489467	9.55053473	0.124230877
1921	SMB	0	5/15/14	22	1.762862135	1.763570019	5.288586406	0.012868089
1922	SMB	0	5/15/14	23	1.603629141	1.60380524	9.621774844	0.055812392
1923	SMB	0	5/16/14	0	2.078033203	2.072425069	12.46819922	0.040648019
1924	SMB	0	5/16/14	1	2.071744153	2.068552032	12.43046492	0.023923423
1925	SMB	0	5/16/14	2	2.270349894	2.288211422	13.62209937	0.044435101
1926	SMB	0	5/16/14	3	1.951337481	1.953804637	5.854012443	0.02065786
1927	SMB	0	5/16/14	22	1.605638158	1.604129514	4.816914474	0.005512834
1928	SMB	0	5/16/14	23	2.110166064	2.108466787	12.66099639	0.029093957
1929	SMB	0	5/17/14	0	1.978256466	1.973490924	11.86953879	0.066117245
1930	SMB	0	5/17/14	1	1.984571315	1.981231434	11.90742789	0.212631576
1931	SMB	0	5/17/14	2	2.163502387	2.161658637	12.98101432	0.017859444
1932	SMB	0	5/17/14	3	1.876851909	1.8781986	5.630555728	0.030188894
1933	SMB	0	5/17/14	22	2.319244898	2.329082764	6.957734695	0.017640074
1934	SMB	0	5/17/14	23	2.881858786	2.879110688	17.29115271	0.130577005
1935	SMB	0	5/18/14	0	2.373369741	2.378001004	14.24021845	0.133829079
1936	SMB	0	5/18/14	1	1.968100354	1.971303281	11.80860212	0.085210014
1937	SMB	0	5/18/14	2	1.482943317	1.481674391	8.897659903	0.113176448
1938	SMB	0	5/18/14	3	1.073305545	1.075544961	3.219916635	0.006281868
1939	SMB	0	5/18/14	22	2.080368269	2.079677184	6.241104807	0.00605136
1940	SMB	0	5/18/14	23	2.25911938	2.254874834	13.55471628	0.300257664
1941	SMB	0	5/19/14	0	2.341605296	2.341401499	14.04963178	0.045204305
1942	SMB	0	5/19/14	1	2.509973352	2.510301064	15.05984011	0.189611349
1943	SMB	0	5/19/14	2	1.871305034	1.874091856	11.2278302	0.009551931
1944	SMB	0	5/19/14	3	1.39457315	1.397410864	4.183719451	0.005475192
1945	SMB	0	5/19/14	22	1.774725386	1.769384769	5.324176157	0.009649196
1946	SMB	0	5/19/14	23	2.623628879	2.623125788	15.74177327	0.225078478
1947	SMB	0	5/20/14	0	3.060129682	3.028819236	18.36077809	0.350041815
1948	SMB	0	5/20/14	1	2.995047639	2.978428003	17.97028584	0.367799551
1949	SMB	0	5/20/14	2	2.565603731	2.564331778	15.39362239	0.060061408
1950	SMB	0	5/20/14	3	2.533964635	2.536083932	7.601893906	0.052867239
1951	SMB	0	5/20/14	22	0.588909877	0.588317435	1.766729631	0.003172555
1952	SMB	0	5/20/14	23	0.634104706	0.634563474	3.804628239	0.017038934
1953	SMB	0	5/21/14	0	0.788813396	0.782948452	4.732880379	0.070218781
1954	SMB	0	5/21/14	1	0.87198223	0.872896169	5.231893381	0.011961608
1955	SMB	0	5/21/14	2	0.895112909	0.891607616	5.370677453	0.010196446
1956	SMB	0	5/21/14	3	0.717479025	0.71879816	2.152437075	0.005152068
1957	SMB	0	5/21/14	22	0.788792545	0.791606838	2.366377634	0.009496615
1958	SMB	0	5/21/14	23	1.013724185	1.006635504	6.08234511	0.062866299
1959	SMB	0	5/22/14	0	1.405231399	1.404430486	8.431388395	0.065938531
1960	SMB	0	5/22/14	1	1.905079425	1.901529867	11.43047655	0.171857413
1961	SMB	0	5/22/14	2	1.671447033	1.668984921	10.0286822	0.027956216
1962	SMB	0	5/22/14	3	1.471971226	1.471295313	4.415913679	0.027067893
1963	SMB	0	5/22/14	22	1.645841371	1.648580752	4.937524112	0.013832299
1964	SMB	0	5/22/14	23	2.016122008	2.014839388	12.09673205	0.127831217
1965	SMB	0	5/23/14	0	2.015483231	2.008880712	12.09289938	0.169975557
1966	SMB	0	5/23/14	1	2.161427312	2.166796739	12.96856387	0.018257614
1967	SMB	0	5/23/14	2	2.030488061	2.020479425	12.18292837	0.061788595
1968	SMB	0	5/23/14	3	1.994123689	1.999829061	5.982371068	0.012949694
1969	SMB	0	5/23/14	22	2.256603317	2.265304026	6.769809952	0.022908308
1970	SMB	0	5/23/14	23	2.638083462	2.63258902	15.82850077	0.076899113
1971	SMB	0	5/24/14	0	2.85348411	2.858889833	17.12090466	0.033893811
1972	SMB	0	5/24/14	1	2.806666658	2.808724403	16.83999995	0.236009532
1973	SMB	0	5/24/14	2	2.399163632	2.383020395	14.39498179	0.105119099
1974	SMB	0	5/24/14	3	1.92683786	1.923465761	5.780513579	0.010469132
1975	SMB	0	5/24/14	22	2.387309595	2.379617015	7.161928786	0.030515106
1976	SMB	0	5/24/14	23	1.580891399	1.578310365	9.485348397	0.235314006
1977	SMB	0	5/25/14	0	1.874349048	1.877671973	11.24609429	0.029713244
1978	SMB	0	5/25/14	1	2.016609381	2.015046278	12.09965628	0.13645481
1979	SMB	0	5/25/14	2	2.245064137	2.242259482	13.47038482	0.104301336
1980	SMB	0	5/25/14	3	1.75250396	1.754778578	5.25751188	0.010370783
1981	SMB	0	5/25/14	22	1.592581822	1.592844178	4.777745466	0.01487095
1982	SMB	0	5/25/14	23	2.007689087	1.999341582	12.04613452	0.149818173
1983	SMB	0	5/26/14	0	2.539230741	2.531055749	15.23538445	0.201244103
1984	SMB	0	5/26/14	1	2.345909617	2.334674593	14.0754577	0.037329813
1985	SMB	0	5/26/14	2	2.320064512	2.315857943	13.92038707	0.038337566
1986	SMB	0	5/26/14	3	1.949655799	1.964201549	5.848967396	0.027125467
1987	SMB	0	5/26/14	22	0.881159612	0.883504924	2.643478837	0.008218759
1988	SMB	0	5/26/14	23	1.757843359	1.744098794	10.54706016	0.243334213
1989	SMB	0	5/27/14	0	1.999221198	1.997302954	11.99532719	0.122509678
1990	SMB	0	5/27/14	1	2.647721317	2.649292329	15.8863279	0.153841814
1991	SMB	0	5/27/14	2	2.851048717	2.841590209	17.1062923	0.433247816
1992	SMB	0	5/27/14	3	2.363851631	2.375940236	7.091554894	0.021152114
1993	SMB	0	5/27/14	22	1.877431424	1.87573031	5.632294273	0.017060706
1994	SMB	0	5/27/14	23	2.801132605	2.809345313	16.80679563	0.236987565
1995	SMB	0	5/28/14	0	2.72268796	2.714407102	16.33612776	0.097716468
1996	SMB	0	5/28/14	1	2.785095178	2.79140535	16.71057107	0.10451296
1997	SMB	0	5/28/14	2	2.171429118	2.16553365	13.02857471	0.064342499
1998	SMB	0	5/28/14	3	2.317132422	2.326470679	6.951397265	0.038819929
1999	SMB	0	5/28/14	22	1.067811865	1.079046736	3.203435594	0.028736918
[truncated: 5,688 more rows]
